# Supplementary material
Source: PubMed Central journal article supplement (PMC4390458)
Supplement: NIHMS657046-supplement-1.pdf [file NIHMS657046-supplement-1.pdf]

## Supplemental Methods, Data and References

### Supplemental Contents

#### 1. Supplemental Materials and Methods

#### 2. Supplemental Tables

Table S1: Expression of c-Met and Mesothelin mRNA in activated CD4 T Cells.

Table S2: Genes upregulated in CD4<sup>+</sup> T cells of healthy human adults expressing c-Met IgG4 continuous CAR or CD19 CD8 $\alpha$  non-continuous CAR on day 11.

Table S3: Genes downregulated in CD4<sup>+</sup> T cells of healthy human adults expressing c-Met IgG4 continuous CAR or CD19 CD8 $\alpha$  non-continuous CAR on day 11.

#### 3. Supplemental Figures

Figure S1. Chimeric antigen receptor constructs and relative expression levels.

Figure S2. CAR T cells with constitutive proliferation retain specific cytotoxicity.

Figure S3. c-Met and mesothelin expression are not detected on human CD4<sup>+</sup> T cells.

Figure S4. Supernatant from CARs displaying the growth phenotype induces activation of naïve unstimulated T cells.

Figure S5. The role of fetal bovine serum in the constitutive growth of c-Met IgG4 28 $\zeta$  CAR T cells.

Figure S6. A) CARs with a constitutive growth phenotype display a unique gene signature. B) CAR T cells with a constitutive growth phenotype display distinct transcription factors.

Figure S7. Genome-wide microarray analysis of CAR T cells with constitutive proliferation.

Figure S8. Distinct gene expression signature of CAR T cells with constitutive proliferation.

Figure S9. CAR T cells with constitutive proliferation have ligand-independent NFAT activation.

Figure S10. Transgene expression levels are sufficient to convey the constitutive CAR growth phenotype.

Figure S11. Constitutive CAR T cell proliferation results in differentiation and evolution of a distinct cell surface phenotype.

Figure S12. Effects of stimulation and cell culture on differentiation of non-transduced T cells.

Figure S13. Temporal patterns of telomere restriction fragment length (TRF) in continuous CAR T cells and mock transduced T cells.

Figure S14. CAR T cells with a constitutive growth phenotype retain a diverse TCR V $\beta$  repertoire.

Figure S15. Engraftment and proliferation of continuous CAR T cells in NSG mice.

Figure S16. PGK100 promoter results in antigen driven accumulation of CAR T cells in tissue but not blood.

#### 4. Supplemental References

## **1. Supplemental Materials and Methods**

### **Cell lines and culture**

Blood samples were obtained from the Human Immunology Core of the University of Pennsylvania where peripheral blood CD4<sup>+</sup> T cells were negatively isolated using RosetteSep Kits (Stem cell Technologies). Cells were cultured in R10 (RPMI 1640 media supplemented with 10% FCS, 100-U/ml penicillin, 100 µg/ml streptomycin sulfate, 10 mM HEPES) in a 37°C and 5% CO<sub>2</sub> incubator. For stimulation, CD4<sup>+</sup> T cells were cultured with activating beads coated with antibodies to CD3 and CD28 at a 1:3 cell to bead ratio. Cells were transduced with lentiviral vectors containing CAR constructs approximately 24 hrs following stimulation. T cells were monitored, kept at a concentration of  $0.75 \times 10^6$ /mL and were considered rested when MCV <175. The M30 and NCI-H522 tumor lines were used in cell killing assays. The M30 cell line (53) is a mesothelial tumor derived at the University of Pennsylvania from mesothelioma tumor tissues from individual patients and was cultured in E-media (10% FCS, 1X ITES, 10 mM HEPES, 0.5 mM Na Pyruvate, 0.1 mM MEM NEAAs, 100ug/mL Pen/Strep, 1ng/mL EGF, 18 ng/mL HC, 0.1 nM T3 in RPMI) while the NCI-H522 (adenocarcinoma) was obtained from the National Cancer Institute and cultured in R10. Jurkat cell line stably transfected with a plasmid containing d2EGFP under the control of a minimal promoter bearing the NFAT consensus binding sequence (pNFAT-d2EGFP) was kindly provided by Arthur Weiss (University of California at San Francisco).

### **Flow cytometry and antibodies**

*CAR surface staining* was performed in FACS buffer (PBS with 3% fetal calf serum) using biotin conjugated polyclonal antibody (Jackson ImmunoResearch). Rabbit anti-human IgG (H+L) was used for cMet IgG4, SS1 IgG4, and CD19 IgG4, while goat anti-mouse (Fab')<sub>2</sub> was used as primary for SS1 CD8a, CD19 CD8a, and SS1 Δtail. Secondary stain for CAR was done using streptavidin-APCeFluor780 (eBioscience). Cell surface marker analysis was done using CD25 PerCp-Cy5.5 (eBioscience, clone BC96), CD70 PE (BD, clone Ki-24), PD-1 PerCP-eFluor710 (eBioscience, clone J105), CD45RO eFluor450 (eBioscience, clone UCHL1), CD27 v450 (BD, clone M-T271), CD28 FITC (eBioscience,

clone CD28.2), CD62L PE (eBioscience, clone DREG-56), CCR7 FITC (BD, clone 150503), Crtam APC (Biolegend, clone Cr24.1) and c-Met PE (R&D systems, clone 95106) at the recommended concentrations. c-Met antigen staining was done using monoclonal anti-human HGF R/c-MET-PE (R&D, clone#95106), and mesothelin expression was analyzed with primary monoclonal mouse anti-human CAK1 (Covance) at 1:50 followed by polyclonal goat anti-mouse PE (BD) at 1:100. Samples were analyzed on a LSR II (BD) and analyzed with FlowJo software (TreeStar).

*PhosFlow* was performed on days 6, 10 and 25. Cells were fixed using BD cytofix buffer (BD) for 10 min at 37C followed by permeabilization using BD Phosflow Perm Buffer III (BD) at 4C for 30 minutes.

Cells were stained at RT for 30 min in the dark using PE anti-Erk1/2 (pT202/pY204) (BD, clone 20A), PE conjugated anti-Akt (pS473) (BD, clone M89-61), PE conjugated anti-NF-kB p65 (pS529) (BD, clone K10-895.12.50), or PE conjugated anti-S6 (pS235/pS236) (BD, clone N7-548) at the recommended concentrations. Positive controls were samples from each group stimulated for 10 min using PMA/Ionomycin prior to fixation, while negative controls were fully stimulated T cells stained using PE conjugated IgG2b kappa isotype control (BD, clone 27-35). Samples were run on a LSR II (BD Biosciences) and analyzed with FlowJo software (TreeStar).

### **Cytokine measurements**

CD4<sup>+</sup> T cells were transduced with CAR constructs as previously described. On days 6, 10, and 30 one million cells were taken from each group, pelleted, washed in R10 and plated at  $1 \times 10^6$ /mL in fresh media. At 24 hrs supernatant was collected and frozen at -80°C. Quantification of soluble cytokine factors was performed using Luminex bead array technology and kits purchased from Life Technologies (Invitrogen 30-plex). Assays were performed as per the manufacturer protocol with 9- point standard curve generated using a 3-fold dilution series and according to laboratory SOP. Each sample was evaluated in duplicate at 1:3 dilution; calculated % CV for the duplicate measures was in most cases less than 5% and always less than 15%. Data were acquired on a FlexMAP-3D and analyzed using XPonent 4.0 software and 5-parameter logistic regression analysis. Standard curve quantification ranges were

determined by the 80-120% (observed/expected value) range. Individual analyte quantification ranges are reported in the Figure legend.

### **Conditioned media transfer**

Supernatant from c-Met IgG4 transduced T cell cultures was collected on day 56, filtered through a 70 $\mu$ m filter and frozen at -80°C in 10 mL aliquots. Day 56 media was thawed and added to unstimulated naïve CD4<sup>+</sup> T cells in culture to reach a final concentration of 12.5%, 25%, and 50% c-Met IgG4 supernatant relative to starting media. As controls, media with and without 100IU of IL-2 was also included, as well as CD3/CD28 bead stimulated cells kept in culture with initial stimulation on day 0 and re-stimulation on day 12. Mean cell volumes were determined and cell media was readjusted every two days to maintain IL-2 concentration within control group and appropriate c-Met IgG4 media transfer ratio described above.

### **V $\beta$ diversity determination**

CD4<sup>+</sup> human T cells were isolated, stimulated and transduced with c-Met IgG4 CAR as described above. Donor matched untransduced cells were stimulated and expanded simultaneously as control.

Untransduced controls required two additional bead stimulations to maintain in culture. Cells were cryopreserved at D0, D13 and D34. Cells were thawed simultaneously and allowed to rest overnight. TCR V $\beta$  analysis was performed using the IOTest Beta Mark TCR V kit (Beckman Coulter) which contains directly-conjugated antibodies specific for the following V $\beta$  families: 1, 2, 3, 4, 5.1, 5.2, 5.3, 7.1, 7.2, 8, 9, 11, 12, 13.1, 13.2, 13.6, 14, 16, 17, 18, 20, 21.3, 22, and 23. Samples were run on a LSR II (BD) with subsequent analysis in FlowJo (TreeStar) to determine percent of total population.

### **Cytotoxicity assay**

A mix of CD4<sup>+</sup> and CD8<sup>+</sup> human T cells electroporated with mRNA encoding the indicated CAR were used for in vitro killing. CD19 CD8 $\alpha$  and c-Met IgG4 CARs were subcloned into a pGEM.64A-based vector previously described (54). The SS1 CD8 $\alpha$  CAR mRNA was made as described (55). The replaced CAR cDNAs were confirmed by direct sequencing and linearized by *SpeI* digestion prior to RNA IVT. mScript RNA System (Epicentre, Madison, WI) was used to generate capped IVT RNA. The IVT RNA was purified using an RNeasy Mini Kit (Qiagen, Inc., Valencia, CA), and purified RNA was eluted in

RNase-free water at 1–2 mg/ml. Human T cells were stimulated by anti-CD3/CD28 beads as described (56). On day 0 the stimulated T cells were washed three times with Opti-MEM and resuspended in Opti-MEM at the final concentration of  $1-3 \times 10^8$ /ml prior to electroporation. Subsequently, the stimulated T cells were mixed with 10  $\mu$ g/0.1 ml of IVT RNA (as indicated) and electroporated in a 2-mm cuvette (Harvard Apparatus BTX, Holliston, MA) using an ECM830 Electro Square Wave Porator (Harvard Apparatus BTX). Tumor lines were then harvested with trypsin and plated in a 6 well dish at  $0.2 \times 10^6$ /mL. 24 hours post T cell electroporation and tumor plating T cells were combined with target cells at increasing effector:target (E:T) ratios in a 6 well plate as well, alongside a no T cell control. Cells were incubated at 37°C for 18 hrs. Cells were collected after incubation, wells were re-trypsinized and washed repeatedly to collect all tumor and T cells. Cells mixtures were stained for tumor with anti-EpCAM (BD, clone EBA-1), T cells with anti-CD45 (BD, clone 2D1), and with 7-AAD (Invitrogen). Cells were resuspended in 400  $\mu$ L FACS buffer containing counting beads (Invitrogen) to normalize data acquisition across samples. Samples were then filtered through a 35 $\mu$ m filter (BD Falcon) and put on ice for analysis. Cells were run on a LSR II (BD) and collection was performed by collecting 1500 bead events for all samples. Analysis was performed by gating on EpCAM(+), CD45(-), and 7-AAD(-) cells in FlowJo (TreeStar). Percent lysis was calculated by dividing total live cells in no T cell control group, by each experimental condition of increasing E:T ratio.

### ***In vivo* T cell persistence experiments**

All animal experiments were approved by the University of Pennsylvania Institutional Animal Care and Use Committee. NSG mice (NOD.Cg-*Prkdc*<sup>scid</sup> *Il2rg*<sup>tm1Wjl</sup>/SzJ) were used for engraftment and persistence experiments. The mice were housed under specific pathogen-free conditions in microisolator cages and given unrestricted access to autoclaved food and acidified water. Animals of both sexes were used for experiments at approximately 20 weeks of age. Human CD4+ T cells were isolated, stimulated and transduced as previously described. A total of  $10 \times 10^6$  cells/mouse were injected peripherally by tail vein injections of which 50% were CAR (+) in the c-Met IgG4 group. Peripheral bleeds were done after 60 days and TruCounts (BD) were done using anti-human CD45 APC-H7 staining for absolute

quantification. Samples were analyzed on a LSR II (BD Bioscience) and quantification was performed using FlowJo (TreeStar).

### **DNA isolation and Q-PCR analysis**

Q-RT/PCR analysis: RNA was isolated from cell lines using RNAqueous RNA isolation kits (Ambion), and cDNA synthesized using iScript cDNA synthesis kits (Bio-Rad). Samples were analyzed for expression of c-met, mesothelin, and PP1B (housekeeping transcript) using ABI Taqman- based technologies and the following ABI recommended gene specific primer probe sets which span exon/intron boundaries: c-met: Hs01565584\_m1\*; mesothelin: HS00245879\_m1\*, and PP1B: Hs00168719\_m1\*. All amplification reactions were performed using an ABI 7500 FAST instrument (ABI-Life technologies), and established laboratory protocols. Each transcript was evaluated in triplicate. Ct values for each amplification reaction were determined using pre-established assay-specific threshold values, with a minimum of 2/3 replicates with % CV <15% required to record a Ct value. Average Ct values were calculated and reported. RQ (relative quantification) values for each transcript was determined according to the formula:  $RQ=2^{-\Delta Ct}$ , with  $\Delta Ct = \Delta Ct_{\text{sample}} - \Delta Ct_{\text{reference}}$ , with  $\Delta Ct_{\text{sample}} = Ct_{\text{sample}} - Ct_{\text{sample normalizer}}$  and  $\Delta Ct_{\text{reference}} = Ct_{\text{reference}} - Ct_{\text{reference normalizer}}$  (57). For all analyses of Supplementary Table S1, the ovarian carcinoma cell line OV79 (positive for both MAGE-A3) served as the reference sample. The ovarian carcinoma-derived cell line OV-79 has been previously described (58). In case of Supplementary Figure 6, untransduced T cells served as a reference sample.

### **Imunohistochemistry**

Tumor tissues were embedded in OCT (Tissue-Tek) and 10 $\mu$ m frozen sections were immunostained with anti-CD3 (Thermo Scientific) antibodies and counterstained with Hematoxylin. Staining was performed by the Pathology Core Laboratories at The Children's Hospital of Philadelphia.

## 2. Supplemental Tables

**Table S1.** Expression of c-Met and Mesothelin mRNA in activated CD4 T Cells.

| SAMPLE INFORMATION  |                      | PP1B | c-MET |       | Mesothelin |        |
|---------------------|----------------------|------|-------|-------|------------|--------|
| CELL LINE           | Timepoint of harvest | Ct   | Ct    | RQ    | Ct         | RQ     |
| OV79<br>(Reference) | none                 | 19.4 | 23.6  | 1     | 23.7       | 1      |
| HD340 resting       | Day 0                | 27.6 | 37.1  | 0.023 | ND         | -      |
| HD340<br>c-Met IgG4 | Day 6                | 22.2 | 32.8  | 0.011 | 37.9       | 0.0003 |
| HD340<br>c-Met IgG4 | Day 11               | 21.7 | 33.1  | 0.006 | 38.7       | 0.0001 |
| HD340<br>c-Met IgG4 | Day 24               | 23.9 | 34.0  | 0.016 | 39.5       | 0.0004 |
| HD306 resting       | Day 0                | 26.7 | 34.8  | 0.066 | 39.2       | 0.0036 |
| HD306 mock          | Day 6                | 22.9 | 33.5  | 0.011 | 38.9       | 0.0003 |
| HD306 mock          | Day 11               | 22.5 | 34.2  | 0.005 | 37.5       | 0.0006 |
| HD306 mock          | Day 24               | 23.9 | 36.7  | 0.002 | ND         | -      |
| HD256 resting       | Day 0                | 26.9 | 39.3  | 0.003 | ND         | -      |
| HD256<br>c-Met IgG4 | Day 6                | 23.0 | 34.6  | 0.006 | 37.4       | 0.0009 |
| HD256<br>c-Met IgG4 | Day 11               | 21.4 | 33.2  | 0.005 | 37.3       | 0.0003 |

CD4+ T cells were cultured as described in legend to Figures 2 and 6, harvested and frozen viably. RNA was isolated from frozen cells, cDNA synthesized, and Q-PCR analysis performed at the indicated time points. Relative Quantification (RQ) values for each sample were determined relative to OV79, a reference tumor cell line known to express c-Met and mesothelin, and using PP1B as the housekeeping gene. HD, healthy donor; ND: not detected.

**Table S2.** Genes upregulated in CD4<sup>+</sup> T cells of healthy human adults expressing c-Met IgG4 continuous CAR compared to CD19 CD8 $\alpha$  non-continuous CAR on day 11.

| Gene Name                                                             | Gene Symbol | RefSeq or Affymetrix ID | p-value  | Fold Change |
|-----------------------------------------------------------------------|-------------|-------------------------|----------|-------------|
| nuclear factor, interleukin 3 regulated                               | NFIL3       | NM_005384               | 6.65E-09 | 5.03        |
| Rho GTPase activating protein 11A                                     | ARHGAP11A   | NM_014783               | 2.60E-07 | 5.04        |
| germ cell associated 2 (haspin)                                       | GSG2        | NM_031965               | 3.44E-08 | 5.04        |
| ubiquitin-conjugating enzyme E2T (putative)                           | UBE2T       | NM_014176               | 2.73E-11 | 5.10        |
| replication factor C (activator 1) 4, 37kDa                           | RFC4        | NM_002916               | 6.99E-10 | 5.11        |
| breast cancer 2, early onset                                          | BRCA2       | NM_000059               | 1.26E-10 | 5.11        |
| fatty acid desaturase 1                                               | FADS1       | NM_013402               | 1.88E-10 | 5.13        |
| minichromosome maintenance complex component 4                        | MCM4        | NM_005914               | 3.85E-11 | 5.14        |
| kinesin family member 20B                                             | KIF20B      | NM_016195               | 9.59E-07 | 5.19        |
| annexin A3                                                            | ANXA3       | NM_005139               | 2.29E-04 | 5.20        |
| Fanconi anemia, complementation group I                               | FANCI       | NM_001113378            | 1.21E-12 | 5.21        |
| ATPase family, AAA domain containing 5                                | ATAD5       | NM_024857               | 2.45E-09 | 5.21        |
| histone cluster 2, H2ab                                               | HIST2H2AB   | NM_175065               | 2.67E-07 | 5.21        |
| nucleolar and spindle associated protein 1                            | NUSAP1      | NM_016359               | 3.67E-08 | 5.22        |
| cell division cycle associated 3                                      | CDCA3       | NM_031299               | 1.06E-10 | 5.22        |
| natural killer cell group 7 sequence                                  | NKG7        | NM_005601               | 2.73E-05 | 5.24        |
| MLF1 interacting protein                                              | MLF1IP      | NM_024629               | 1.60E-08 | 5.25        |
| cyclin-dependent kinase 2                                             | CDK2        | NM_001798               | 5.38E-11 | 5.25        |
| extra spindle pole bodies homolog 1 ( <i>S. cerevisiae</i> )          | ESPL1       | NM_012291               | 4.50E-11 | 5.27        |
| DNA replication helicase 2 homolog (yeast)                            | DNA2        | NM_001080449            | 2.85E-10 | 5.28        |
| guanine nucleotide binding protein (G protein), alpha 15 (Gq class)   | GNA15       | NM_002068               | 3.11E-08 | 5.30        |
| solute carrier family 26, member 4                                    | SLC26A4     | NM_000441               | 7.25E-09 | 5.32        |
| LIM domain and actin binding 1                                        | LIMA1       | NM_001113546            | 4.21E-11 | 5.42        |
| histone cluster 1, H2a1                                               | HIST1H2AL   | NM_003511               | 2.21E-10 | 5.44        |
| chemokine (C-C motif) receptor 2                                      | CCR2        | NM_001123041            | 1.16E-06 | 5.45        |
| ELOVL family member 6, elongation of long chain fatty acids           | ELOVL6      | NM_024090               | 1.23E-08 | 5.45        |
| kinesin family member C1                                              | KIFC1       | NM_002263               | 1.47E-08 | 5.46        |
| Nedd4 family interacting protein 2                                    | NDFIP2      | NM_019080               | 6.67E-10 | 5.47        |
| dihydrofolate reductase                                               | DHFR        | NM_000791               | 3.63E-07 | 5.51        |
| CDC28 protein kinase regulatory subunit 1B                            | CKS1B       | NM_001826               | 1.05E-08 | 5.51        |
| replication factor C (activator 1) 3, 38kDa                           | RFC3        | NM_002915               | 4.02E-10 | 5.51        |
| gamma-glutamyl hydrolase (conjugase, foylpolgamma glutamyl hydrolase) | GGH         | NM_003878               | 5.41E-09 | 5.52        |
| transmembrane protein 106C                                            | TMEM106C    | NM_001143842            | 2.66E-08 | 5.53        |
| cell division cycle associated 5                                      | CDCA5       | NM_080668               | 1.48E-08 | 5.54        |
| centromere protein A                                                  | CENPA       | NM_001809               | 1.21E-11 | 5.55        |
| protein regulator of cytokinesis 1                                    | PRC1        | NM_003981               | 1.08E-10 | 5.55        |
| CHK1 checkpoint homolog ( <i>S. pombe</i> )                           | CHEK1       | NM_001274               | 1.23E-09 | 5.58        |



| Gene Name                                                                       | Gene Symbol | RefSeq or Affymetrix ID | p-value  | Fold Change |
|---------------------------------------------------------------------------------|-------------|-------------------------|----------|-------------|
| origin recognition complex, subunit 1                                           | ORC1        | NM_004153               | 1.74E-15 | 5.60        |
| CDC28 protein kinase regulatory subunit 1B                                      | CKS1B       | NM_001826               | 8.55E-09 | 5.64        |
| dihydrofolate reductase pseudogene                                              | LOC1720     | NR_033423               | 1.31E-06 | 5.68        |
| interferon, gamma                                                               | IFNG        | NM_000619               | 6.16E-08 | 5.71        |
| interleukin 2 receptor, alpha                                                   | IL2RA       | NM_000417               | 7.32E-12 | 5.76        |
| ATPase, class I, type 8B, member 4                                              | ATP8B4      | NM_024837               | 1.22E-09 | 5.77        |
| CD180 molecule                                                                  | CD180       | NM_005582               | 1.24E-04 | 5.79        |
| chemokine (C-C motif) receptor 2                                                | CCR2        | NM_001123396            | 1.48E-07 | 5.85        |
| breast cancer 1, early onset                                                    | BRCA1       | NR_027676               | 2.27E-09 | 5.86        |
| hypothetical LOC151009                                                          | LOC151009   | AK095678                | 5.30E-09 | 5.93        |
| coiled-coil domain containing 99                                                | CCDC99      | NM_017785               | 1.07E-07 | 5.95        |
| citron (rho-interacting, serine/threonine kinase 21)                            | CIT         | NM_007174               | 3.48E-13 | 5.96        |
| oncostatin M                                                                    | OSM         | NM_020530               | 1.30E-08 | 6.00        |
| solute carrier family 43, member 3                                              | SLC43A3     | NM_017611               | 1.20E-10 | 6.01        |
| chromosome 11 open reading frame 82                                             | C11orf82    | NM_145018               | 1.81E-08 | 6.01        |
| interferon, gamma-inducible protein 30                                          | IFI30       | NM_006332               | 3.78E-04 | 6.02        |
| histone cluster 1, H3b                                                          | HIST1H3B    | NM_003537               | 3.45E-07 | 6.03        |
| BRCA1 interacting protein C-terminal helicase 1                                 | BRIP1       | NM_032043               | 4.69E-09 | 6.11        |
| KDEL (Lys-Asp-Glu-Leu) containing 1                                             | KDEL1       | NM_024089               | 1.03E-08 | 6.16        |
| centromere protein F, 350/400kDa (mitosin)                                      | CENPF       | NM_016343               | 7.84E-11 | 6.19        |
| RAD51 homolog (RecA homolog, E. coli) (S. cerevisiae)                           | RAD51       | NM_002875               | 3.01E-10 | 6.20        |
| WD repeat and HMG-box DNA binding protein 1                                     | WDHD1       | NM_007086               | 2.71E-09 | 6.23        |
| DEP domain containing 1B                                                        | DEPDC1B     | NM_018369               | 2.17E-12 | 6.24        |
| centromere protein N                                                            | CENPN       | NM_001100624            | 4.70E-09 | 6.29        |
| X-ray repair complementing defective repair in Chinese hamster cells 2          | XRCC2       | NM_005431               | 1.44E-09 | 6.32        |
| solute carrier family 7, (cationic amino acid transporter, y+ system) member 11 | SLC7A11     | NM_014331               | 5.74E-05 | 6.32        |
| purinergic receptor P2Y, G-protein coupled, 14                                  | P2RY14      | NM_014879               | 1.32E-08 | 6.34        |
| exonuclease 1                                                                   | EXO1        | NM_130398               | 2.84E-11 | 6.37        |
| phosphoglycerate dehydrogenase                                                  | PHGDH       | NM_006623               | 4.54E-11 | 6.37        |
| chemokine (C-C motif) ligand 4                                                  | CCL4        | NM_002984               | 8.33E-06 | 6.39        |
| interleukin 18 receptor accessory protein                                       | IL18RAP     | NM_003853               | 1.32E-06 | 6.40        |
| granzyme B (granzyme 2, cytotoxic T-lymphocyte-associated serine esterase 1)    | GZMB        | NM_004131               | 9.23E-07 | 6.43        |
| spindle and kinetochore associated complex subunit 3                            | SKA3        | NM_145061               | 8.97E-07 | 6.47        |
| histone cluster 1, H2bm                                                         | HIST1H2BM   | NM_003521               | 1.58E-07 | 6.49        |
| nei endonuclease VIII-like 3 (E. coli)                                          | NEIL3       | NM_018248               | 4.64E-09 | 6.53        |
| RAB27B, member RAS oncogene family                                              | RAB27B      | NM_004163               | 1.01E-08 | 6.55        |
| epithelial membrane protein 1                                                   | EMP1        | NM_001423               | 6.73E-07 | 6.60        |
| v-myb myeloblastosis viral oncogene homolog (avian)-like 2                      | MYBL2       | NM_002466               | 3.47E-09 | 6.65        |

| Gene Name                                                                 | Gene Symbol | RefSeq or Affymetrix ID | p-value  | Fold Change |
|---------------------------------------------------------------------------|-------------|-------------------------|----------|-------------|
| KIAA1524, Protein CIP2A also known as cancerous inhibitor of PP2A (CIP2A) | KIAA1524    | NM_020890               | 1.35E-10 | 6.68        |
| hematopoietic prostaglandin D synthase                                    | HPGDS       | NM_014485               | 1.80E-07 | 6.72        |
| interleukin 18 receptor 1                                                 | IL18R1      | NM_003855               | 8.92E-08 | 6.75        |
| minichromosome maintenance complex component 8                            | MCM8        | NM_032485               | 1.11E-11 | 6.75        |
| non-SMC condensin II complex, subunit G2                                  | NCAPG2      | NM_017760               | 1.27E-10 | 6.76        |
| thyroid hormone receptor interactor 13                                    | TRIP13      | NM_004237               | 1.91E-13 | 6.79        |
| interleukin 21                                                            | IL21        | NM_021803               | 3.95E-07 | 6.81        |
| chromosome 15 open reading frame 42                                       | C15orf42    | NM_152259               | 2.01E-11 | 6.82        |
| E2F transcription factor 8                                                | E2F8        | NM_024680               | 2.50E-12 | 6.84        |
| NIMA (never in mitosis gene a)-related kinase 2                           | NEK2        | NM_002497               | 4.79E-09 | 6.89        |
| minichromosome maintenance complex component 10                           | MCM10       | NM_182751               | 5.93E-11 | 7.01        |
| ribonucleotide reductase M2                                               | RRM2        | NM_001165931            | 1.42E-07 | 7.02        |
| histone cluster 1, H2bb                                                   | HIST1H2BB   | NM_021062               | 8.90E-07 | 7.04        |
| cell division cycle associated 2                                          | CDCA2       | NM_152562               | 3.54E-11 | 7.13        |
| Holliday junction recognition protein                                     | HJURP       | NM_018410               | 2.17E-12 | 7.14        |
| proline rich 11                                                           | PRR11       | NM_018304               | 7.94E-09 | 7.15        |
| polymerase (DNA directed), epsilon 2 (p59 subunit)                        | POLE2       | NM_002692               | 3.57E-10 | 7.18        |
| chromosome 4 open reading frame 21                                        | C4orf21     | NM_018392               | 3.41E-09 | 7.18        |
| polymerase (DNA directed), theta                                          | POLQ        | NM_199420               | 1.82E-10 | 7.19        |
| histone cluster 1, H1b                                                    | HIST1H1B    | NM_005322               | 3.60E-08 | 7.20        |
| budding uninhibited by benzimidazoles 1 homolog beta (yeast)              | BUB1B       | NM_001211               | 1.98E-09 | 7.21        |
| family with sequence similarity 54, member A                              | FAM54A      | NM_001099286            | 5.31E-11 | 7.27        |
| epithelial cell transforming sequence 2 oncogene, ARHGEF31                | ECT2        | NM_018098               | 5.05E-09 | 7.32        |
| cyclin A1                                                                 | CCNA1       | NM_003914               | 3.86E-09 | 7.41        |
| kinesin family member 4A                                                  | KIF4A       | NM_012310               | 1.42E-08 | 7.42        |
| chromosome 4 open reading frame 46                                        | C4orf46     | NM_001008393            | 6.31E-08 | 7.43        |
| interleukin 1, alpha                                                      | IL1A        | NM_000575               | 9.74E-09 | 7.55        |
| SCL/TAL1 interrupting locus                                               | STIL        | NM_001048166            | 1.48E-08 | 7.56        |
| aurora kinase A                                                           | AURKA       | NM_198433               | 8.44E-08 | 7.64        |
| cyclin B1                                                                 | CCNB1       | NM_031966               | 1.75E-09 | 7.64        |
| ASF1 anti-silencing function 1 homolog B ( <i>S. cerevisiae</i> )         | ASF1B       | NM_018154               | 2.42E-10 | 7.65        |
| forkhead box M1                                                           | FOXM1       | NM_202002               | 6.65E-10 | 7.74        |
| stearoyl-CoA desaturase (delta-9-desaturase)                              | SCD         | NM_005063               | 2.27E-12 | 7.76        |
| cell division cycle 45 homolog ( <i>S. cerevisiae</i> )                   | CDC45       | NM_001178010            | 4.81E-11 | 7.82        |
| diaphanous homolog 3 ( <i>Drosophila</i> )                                | DIAPH3      | NM_001042517            | 2.67E-11 | 7.89        |
| kinesin family member 23                                                  | KIF23       | NM_138555               | 3.97E-08 | 7.94        |
| sperm associated antigen 5                                                | SPAG5       | NM_006461               | 1.19E-11 | 7.95        |
| polo-like kinase 4                                                        | PLK4        | NM_014264               | 7.19E-11 | 8.00        |

| Gene Name                                                                     | Gene Symbol | RefSeq or Affymetrix ID | p-value  | Fold Change |
|-------------------------------------------------------------------------------|-------------|-------------------------|----------|-------------|
| kinesin family member 11                                                      | KIF11       | NM_004523               | 4.17E-09 | 8.03        |
| cell division cycle associated 8                                              | CDCA8       | NM_018101               | 3.48E-11 | 8.04        |
| KIAA0101, PCNA-associated factor                                              | KIAA0101    | NM_014736               | 6.75E-08 | 8.07        |
| meiotic nuclear divisions 1 homolog ( <i>S. cerevisiae</i> )                  | MND1        | NM_032117               | 2.40E-08 | 8.09        |
| kinesin family member 2C                                                      | KIF2C       | NM_006845               | 1.08E-10 | 8.11        |
| TPX2, microtubule-associated, homolog ( <i>Xenopus laevis</i> )               | TPX2        | NM_012112               | 6.41E-11 | 8.15        |
| KI-678, antigen identified by monoclonal antibody Ki-67                       | MKI67       | NM_002417               | 2.81E-10 | 8.16        |
| claspin                                                                       | CLSPN       | NM_022111               | 4.84E-09 | 8.21        |
| kinesin family member 18A                                                     | KIF18A      | NM_031217               | 3.37E-08 | 8.22        |
| non-SMC condensin I complex, subunit H                                        | NCAPH       | NM_015341               | 4.27E-09 | 8.23        |
| defective in sister chromatid cohesion 1 homolog ( <i>S. cerevisiae</i> )     | DSCC1       | NM_024094               | 1.06E-09 | 8.26        |
| shugoshin-like 2 ( <i>S. pombe</i> )                                          | SGOL2       | NM_152524               | 4.10E-09 | 8.46        |
| apolipoprotein B mRNA editing enzyme, catalytic polypeptide-like 3B           | APOBEC3B    | NM_004900               | 5.40E-09 | 8.49        |
| phosphatidic acid phosphatase type 2A                                         | PPAP2A      | NM_003711               | 1.13E-12 | 8.49        |
| cyclin A2                                                                     | CCNA2       | NM_001237               | 1.06E-09 | 8.64        |
| kinesin family member 20A                                                     | KIF20A      | NM_005733               | 1.99E-09 | 8.88        |
| anillin, actin binding protein                                                | ANLN        | NM_018685               | 3.60E-09 | 8.93        |
| thymidylate synthetase                                                        | TYMS        | NM_001071               | 8.77E-10 | 8.98        |
| topoisomerase (DNA) II alpha 170kDa                                           | TOP2A       | NM_001067               | 2.21E-09 | 9.03        |
| histone cluster 1, H3f                                                        | HIST1H3F    | NM_021018               | 1.11E-06 | 9.08        |
| GIN5 complex subunit 2 ( <i>Psf2</i> homolog)                                 | GIN52       | NM_016095               | 2.85E-10 | 9.09        |
| family with sequence similarity 111, member B                                 | FAM111B     | NM_198947               | 7.28E-07 | 9.13        |
| chemokine (C-C motif) receptor 1                                              | CCR1        | NM_001295               | 7.58E-09 | 9.19        |
| cytoskeleton associated protein 2-like                                        | CKAP2L      | NM_152515               | 1.86E-11 | 9.23        |
| centromere protein E, 312kDa                                                  | CENPE       | NM_001813               | 1.99E-08 | 9.27        |
| asp (abnormal spindle) homolog, microcephaly associated ( <i>Drosophila</i> ) | ASPM        | NM_018136               | 2.06E-10 | 9.28        |
| cyclin-dependent kinase inhibitor 3                                           | CDKN3       | NM_005192               | 1.53E-08 | 9.33        |
| polo-like kinase 1                                                            | PLK1        | NM_005030               | 6.58E-12 | 9.54        |
| TTK protein kinase, hMps1                                                     | TTK         | NM_003318               | 4.75E-10 | 9.55        |
| cancer susceptibility candidate 5                                             | CASC5       | NM_170589               | 1.09E-08 | 9.78        |
| spindle and kinetochore associated complex subunit 1                          | SKA1        | NM_001039535            | 3.16E-10 | 9.86        |
| DEP domain containing 1                                                       | DEPDC1      | NM_001114120            | 2.52E-09 | 9.86        |
| non-SMC condensin I complex, subunit G                                        | NCAPG       | NM_022346               | 6.57E-10 | 9.95        |
| budding uninhibited by benzimidazoles 1 homolog (yeast)                       | BUB1        | NM_004336               | 5.75E-11 | 10.12       |
| RAD51 associated protein 1                                                    | RAD51AP1    | NM_001130862            | 2.43E-10 | 10.14       |
| kinesin family member 14                                                      | KIF14       | NM_014875               | 1.92E-10 | 10.15       |
| colony stimulating factor 2 (granulocyte-macrophage)                          | CSF2        | NM_000758               | 1.58E-08 | 10.28       |

| Gene Name                                                                    | Gene Symbol | RefSeq or Affymetrix ID | p-value  | Fold Change |
|------------------------------------------------------------------------------|-------------|-------------------------|----------|-------------|
| fatty acid desaturase 2                                                      | FADS2       | NM_004265               | 1.84E-09 | 10.31       |
| heparin-binding EGF-like growth factor                                       | HBEGF       | NM_001945               | 2.31E-09 | 10.31       |
| GINS complex subunit 1 (Psf1 homolog)                                        | GINS1       | NM_021067               | 5.35E-12 | 10.31       |
| shugoshin-like 1 ( <i>S. pombe</i> )                                         | SGOL1       | NM_001012410            | 1.89E-09 | 10.47       |
| cell division cycle 20 homolog ( <i>S. cerevisiae</i> )                      | CDC20       | NM_001255               | 1.32E-10 | 10.50       |
| family with sequence similarity 72, member D                                 | FAM72D      | AB096683                | 5.52E-11 | 10.74       |
| maternal embryonic leucine zipper kinase                                     | MELK        | NM_014791               | 1.92E-10 | 10.75       |
| interleukin 17 receptor B                                                    | IL17RB      | NM_018725               | 5.42E-08 | 10.85       |
| family with sequence similarity 72, member D                                 | FAM72D      | AB096683                | 2.82E-10 | 10.91       |
| kinesin family member 15                                                     | KIF15       | NM_020242               | 1.64E-10 | 10.99       |
| interleukin 3 (colony-stimulating factor, multiple)                          | IL3         | NM_000588               | 4.31E-10 | 11.00       |
| family with sequence similarity 72, member D                                 | FAM72D      | AB096683                | 3.17E-10 | 11.21       |
| centromere protein I                                                         | CENPI       | NM_006733               | 9.64E-11 | 11.32       |
| NUF2, NDC80 kinetochore complex component, homolog ( <i>S. cerevisiae</i> )  | NUF2        | NM_145697               | 1.20E-10 | 11.33       |
| hyaluronan-mediated motility receptor (RHAMM)                                | HMMR        | NM_001142556            | 3.12E-12 | 11.76       |
| PDZ binding kinase                                                           | PBK         | NM_018492               | 1.35E-09 | 12.06       |
| SHC SH2-domain binding protein 1                                             | SHCBP1      | NM_024745               | 3.84E-11 | 12.24       |
| centrosomal protein 55kDa                                                    | CEP55       | NM_018131               | 1.93E-09 | 12.29       |
| cell division cycle 6 homolog ( <i>S. cerevisiae</i> )                       | CDC6        | NM_001254               | 7.19E-11 | 12.52       |
| SPC25, NDC80 kinetochore complex component, homolog ( <i>S. cerevisiae</i> ) | SPC25       | NM_020675               | 5.68E-10 | 12.74       |
| leukemia inhibitory factor (cholinergic differentiation factor)              | LIF         | NM_002309               | 8.95E-10 | 12.89       |
| cyclin E2                                                                    | CCNE2       | NM_057749               | 6.32E-11 | 13.30       |
| denticleless homolog ( <i>Drosophila</i> )                                   | DTL         | NM_016448               | 1.59E-12 | 13.39       |
| discs, large ( <i>Drosophila</i> ) homolog-associated protein 5              | DLGAP5      | NM_014750               | 1.11E-09 | 13.69       |
| establishment of cohesion 1 homolog 2 ( <i>S. cerevisiae</i> )               | ESCO2       | NM_001017420            | 2.92E-11 | 13.84       |
| cyclin B2                                                                    | CCNB2       | NM_004701               | 5.37E-10 | 14.57       |
| granzyme A (granzyme 1, cytotoxic T-lymphocyte-associated serine esterase 3) | GZMA        | NM_006144               | 7.81E-12 | 15.62       |
| cyclin-dependent kinase 1                                                    | CDK1        | NM_001786               | 1.73E-09 | 19.22       |
| family with sequence similarity 72, member D                                 | FAM72D      | AB096683                | 1.69E-08 | 19.52       |
| dual specificity phosphatase 6                                               | DUSP6       | NM_001946               | 1.34E-09 | 22.97       |
| chemokine (C-X-C motif) ligand 10                                            | CXCL10      | NM_001565               | 1.61E-05 | 25.53       |
| interleukin 13                                                               | IL13        | NM_002188               | 4.92E-12 | 42.92       |
| prostaglandin I2 (prostacyclin) synthase                                     | PTGIS       | NM_000961               | 8.14E-12 | 44.57       |

**Table S3.** Genes downregulated in CD4+ T cells of healthy human adults expressing c-Met IgG4 continuous CAR compared to CD19 CD8 $\alpha$  non-continuous CAR on day 11.

| Gene Name                                                     | Gene Symbol | RefSeq or Affymetrix ID | p-value  | Fold Change |
|---------------------------------------------------------------|-------------|-------------------------|----------|-------------|
| ---                                                           | ---         | 8168079                 | 3.08E-04 | -5.01       |
| kelch-like 24 (Drosophila)                                    | KLHL24      | NM_017644               | 3.09E-10 | -5.01       |
| ---                                                           | ---         | 8107857                 | 5.02E-04 | -5.07       |
| small nucleolar RNA, C/D box 116-4                            | SNORD116-4  | NR_003319               | 1.03E-06 | -5.18       |
| small nucleolar RNA, C/D box 116-8                            | SNORD116-8  | NR_003323               | 7.66E-08 | -5.19       |
| small nucleolar RNA, H/ACA box 1                              | SNORA1      | NR_003026               | 4.83E-04 | -5.24       |
| small nucleolar RNA, H/ACA box 10                             | SNORA10     | NR_002327               | 5.19E-05 | -5.29       |
| adenylate kinase 5                                            | AK5         | NM_174858               | 1.30E-07 | -5.38       |
| odz, odd Oz/ten-m homolog 1(Drosophila)                       | ODZ1        | NM_001163278            | 3.17E-06 | -5.41       |
| small nucleolar RNA, C/D box 6                                | SNORD6      | NR_003036               | 7.26E-04 | -5.42       |
| LY9, lymphocyte antigen 9                                     | LY9         | NM_002348               | 2.40E-07 | -5.45       |
| killer cell lectin-like receptor subfamily B, member 1        | KLRB1       | NM_002258               | 1.03E-06 | -5.46       |
| small Cajal body-specific RNA 5                               | SCARNA5     | NR_003008               | 1.23E-05 | -5.53       |
| ---                                                           | ---         | 8135943                 | 5.12E-04 | -5.73       |
| small nucleolar RNA, H/ACA box 52                             | SNORA52     | NR_002585               | 5.27E-05 | -5.81       |
| Fas apoptotic inhibitory molecule 3                           | FAIM3       | NM_005449               | 8.07E-11 | -5.89       |
| transmembrane protein 63A                                     | TMEM63A     | NM_014698               | 2.22E-08 | -5.95       |
| programmed cell death 4 (neoplastic transformation inhibitor) | PDCD4       | NM_145341               | 4.02E-10 | -6.21       |
| small nucleolar RNA, H/ACA box 60                             | SNORA60     | NR_002986               | 1.66E-04 | -6.30       |
| ---                                                           | ---         | 8016213                 | 1.73E-04 | -6.37       |
| ---                                                           | ---         | 7938625                 | 8.47E-04 | -6.55       |
| ribonuclease P RNA component H1                               | RPPH1       | NR_002312               | 2.86E-06 | -6.61       |
| ---                                                           | ---         | 7958273                 | 1.11E-07 | -6.91       |
| ---                                                           | ---         | 8031931                 | 9.24E-04 | -6.96       |
| G protein-coupled receptor 155                                | GPR155      | NM_001033045            | 2.78E-10 | -7.28       |
| phosphoinositide-3-kinase interacting protein 1               | PIK3IP1     | NM_052880               | 2.07E-09 | -7.43       |
| small nucleolar RNA, H/ACA box 42                             | SNORA42     | NR_002974               | 2.76E-05 | -7.46       |
| t-complex 11 (mouse)-like 2                                   | TCP11L2     | NM_152772               | 1.66E-09 | -7.58       |
| small Cajal body-specific RNA 4                               | SCARNA4     | NR_003005               | 2.37E-04 | -7.68       |
| ---                                                           | ---         | 8050350                 | 3.26E-04 | -8.50       |
| RNA, U4 small nuclear 2                                       | RNU4-2      | NR_003137               | 1.31E-04 | -8.63       |
| V-set and immunoglobulin domain containing 1                  | VSIG1       | NM_001170553            | 7.85E-09 | -8.72       |
| small Cajal body-specific RNA 6                               | SCARNA6     | NR_003006               | 1.60E-05 | -9.36       |
| ---                                                           | ---         | 8073680                 | 4.26E-04 | -9.59       |
| EPH receptor A4                                               | EPHA4       | NM_004438               | 5.16E-10 | -10.77      |
| NEL-like 2 (chicken)                                          | NELL2       | NM_006159               | 7.47E-09 | -12.65      |

### 3. Supplemental Figures and Legends

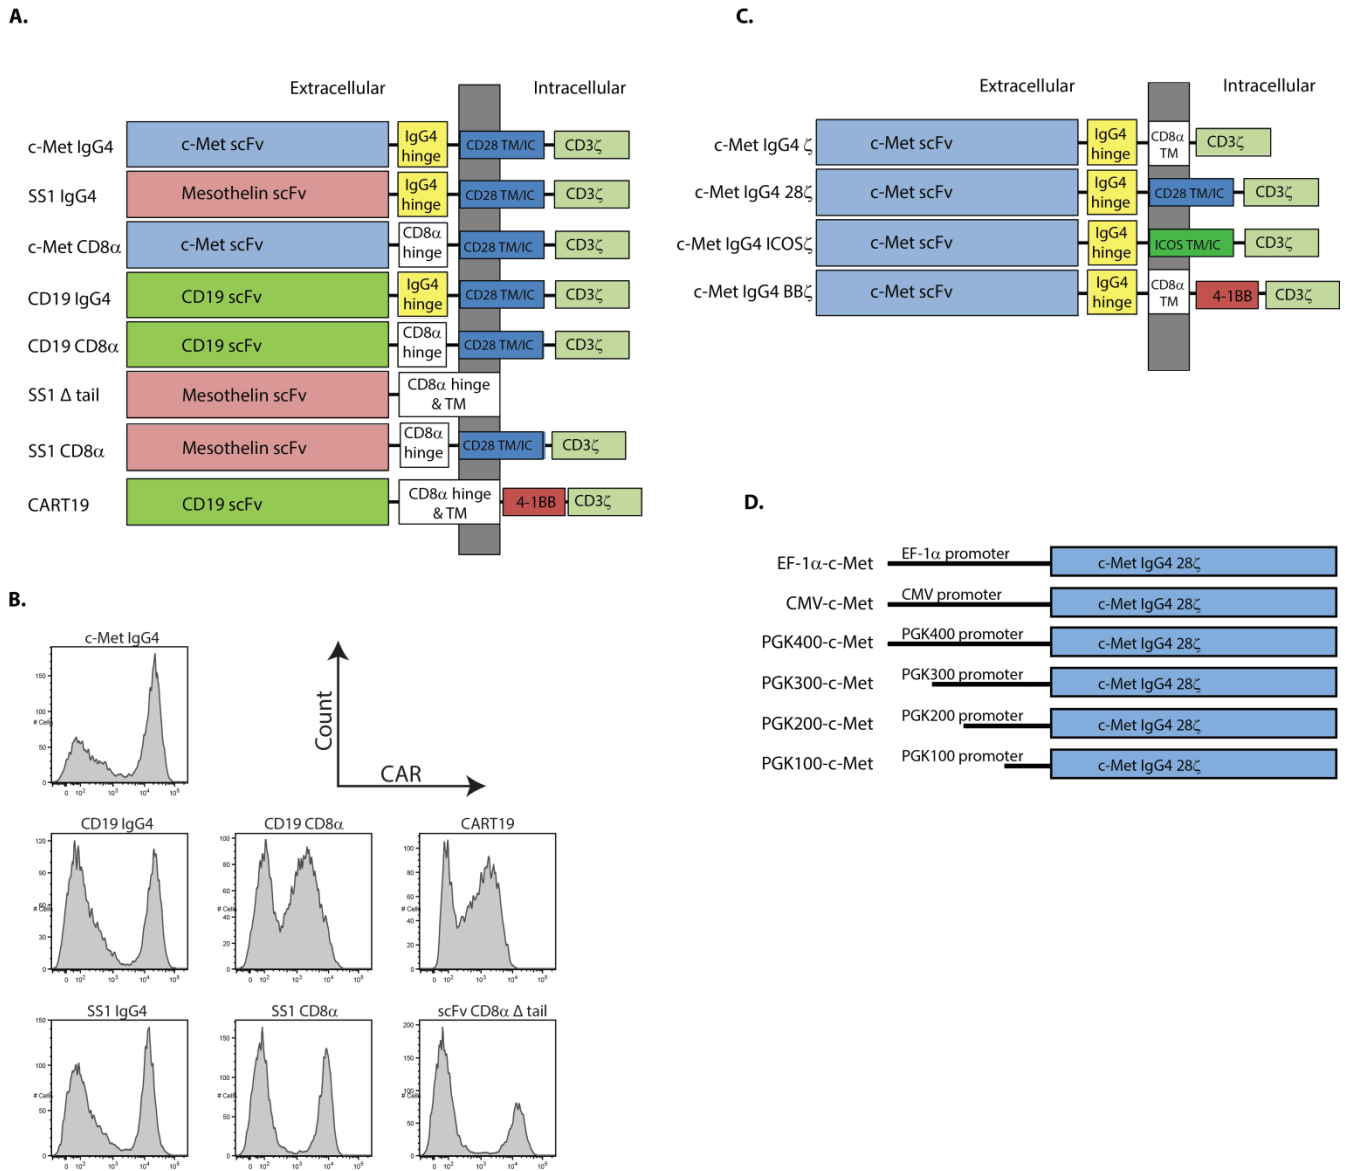

#### Supplemental Figure 1. Chimeric antigen receptor constructs and relative expression levels. A)

Representation of CAR constructs depicting the various scFv, hinge regions, transmembrane and cytosolic domains. **B)** The surface expression of each CAR construct in (A) was analyzed 6 days following lentiviral transduction to quantify relative expression levels. CAR expression was determined as described in Methods. **C)** CAR constructs used in main text figures 1 to 5. **D)** CAR constructs with promoter variations used in the experiments shown in main text figures 6 and 7.

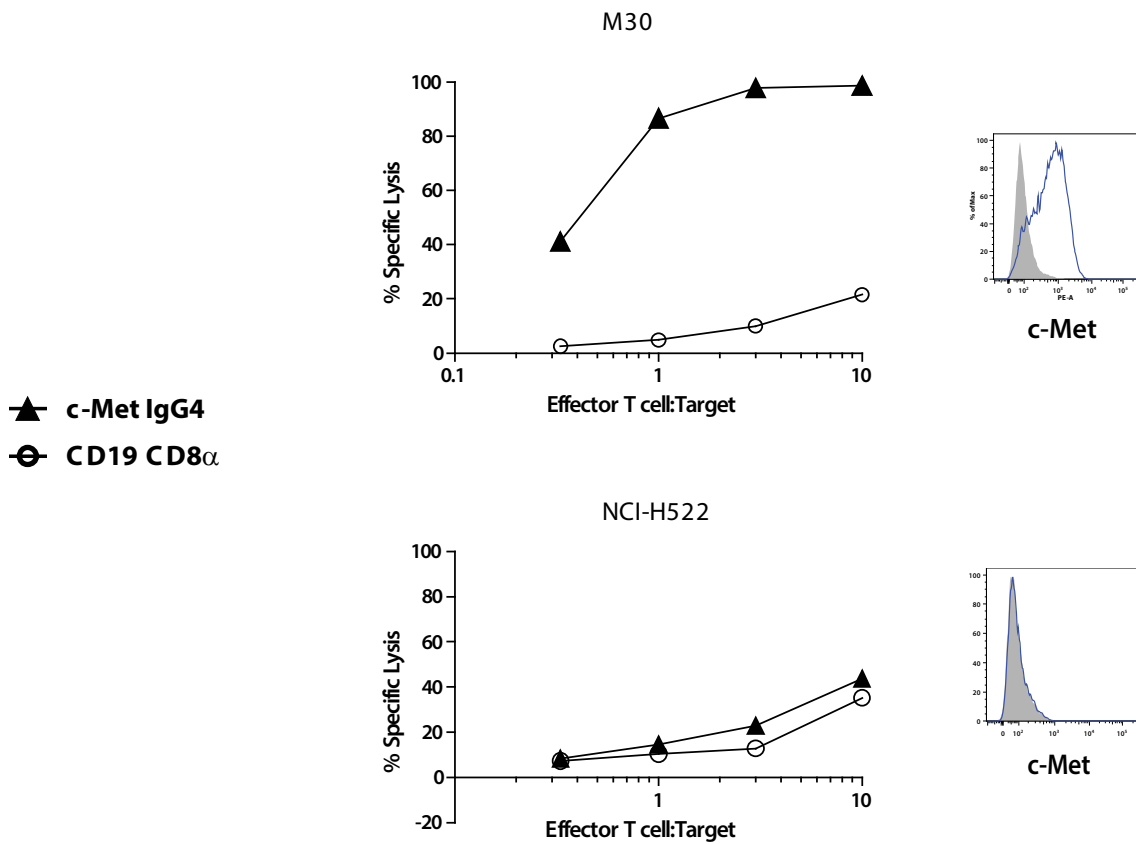

**Supplemental Figure 2. CAR T cells with constitutive proliferation retain specific cytotoxicity.** The M30 tumor line (endogenous expression of c-Met), and the NCI-H522 tumor line (lacking c-Met expression) were cultured at the indicated effector to target ratio with c-Met IgG4 CAR T cells. CD19 CD8 $\alpha$  CAR T cells were used as specificity controls to exclude allogeneic effects. Inset boxes: c-Met expression on M30 and NCI-H522.

### c-Met Antigen Expression

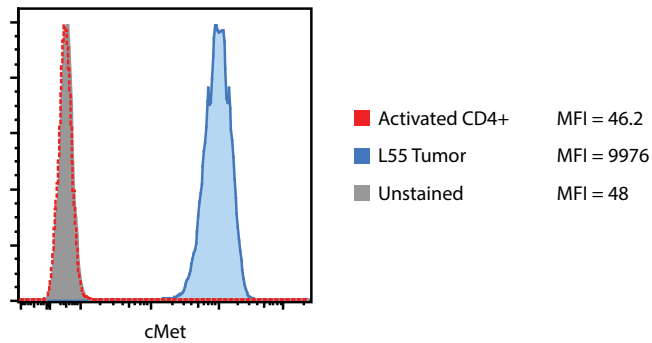

### Mesothelin Expression

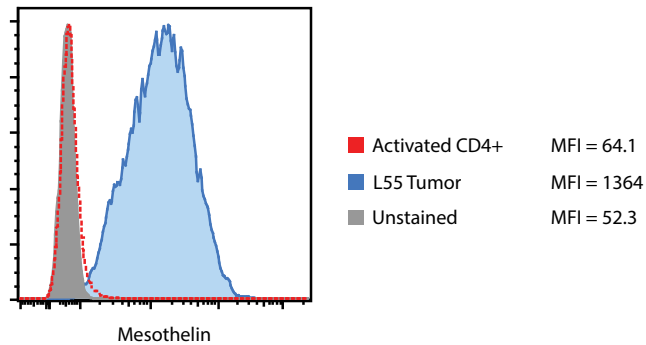

**Supplemental Figure 3. c-Met and mesothelin expression are not detected on human CD4+ T cells.** Samples were compared to L55, a non-small cell lung tumor cell line, as well as unstained CD4+ T cells. Following activation, human CD4+ T cells and tumor lines were stained for c-Met (PE) or mesothelin (PE). Histograms depict unstained activated CD4+ T cells (grey), activated CD4+ T cells (red), and the L55 tumor stained for described antigen. The mean fluorescence intensity (MFI) is indicated.



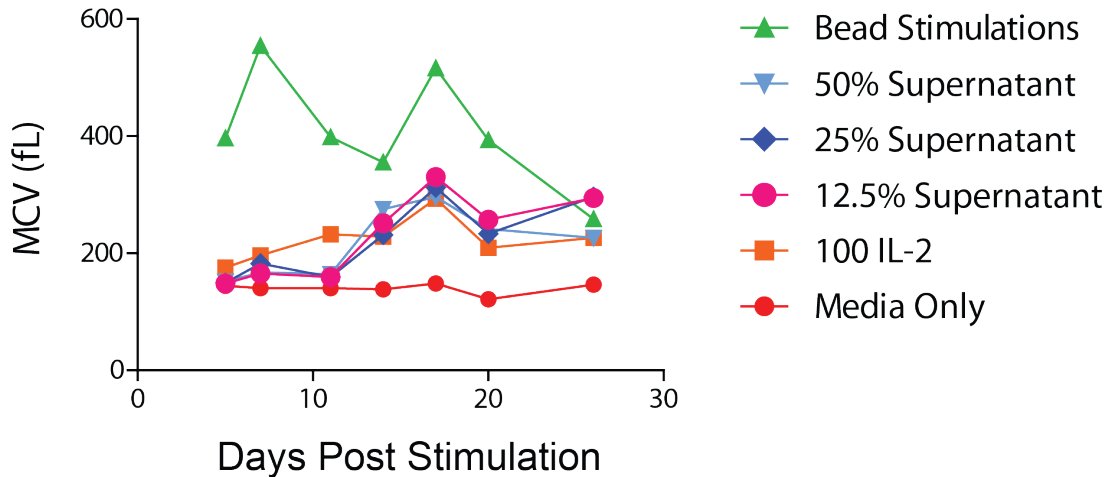

**Supplemental Figure 4. Supernatant from CARs displaying the growth phenotype induces activation of naïve unstimulated T cells.** Culture supernatant from c-Met IgG4 CAR T cell culture harvested on day 56 of culture was added to unstimulated naïve CD4<sup>+</sup> T cells at a final concentration of 12.5%, 25%, or 50% c-Met IgG4 supernatant relative to starting media. As controls, media with and without 100IU of IL-2 were also included, as well as anti-CD3/CD28 bead stimulated untransduced T cells kept in culture with initial stimulation on day 0 and re-stimulation on day 12. MCVs were determined and cell media was added every two days to maintain the supernatant concentration and IL-2 concentration within control group as described above.

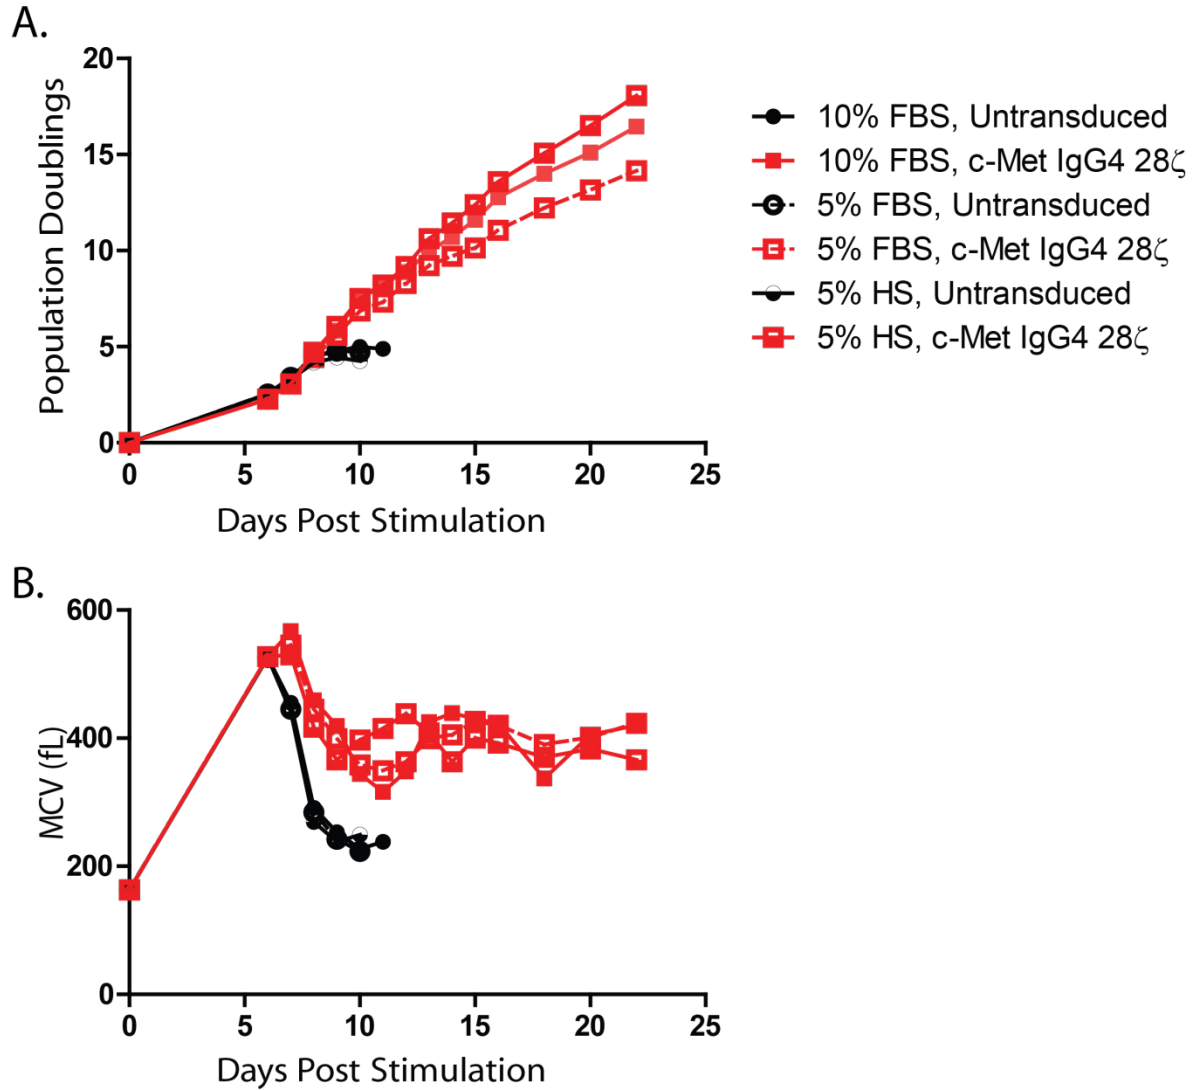

**Supplemental Figure 5. The role of fetal bovine serum in the constitutive growth of c-Met IgG4 28 $\zeta$  CAR T cells.** In vitro proliferation of CD4<sup>+</sup> T cells following 5 days of  $\alpha$ CD3/CD28 coated magnetic bead stimulation and lentiviral transduction. All cells were initially activated and propagated in 10% fetal bovine serum (FBS) containing culture media. 6 days after activation, cells were separately grown in media containing 10% FBS, 5% FBS or 5% human serum (HS). Population doubling (A) and mean cell volume (MCV) (B) were determined.

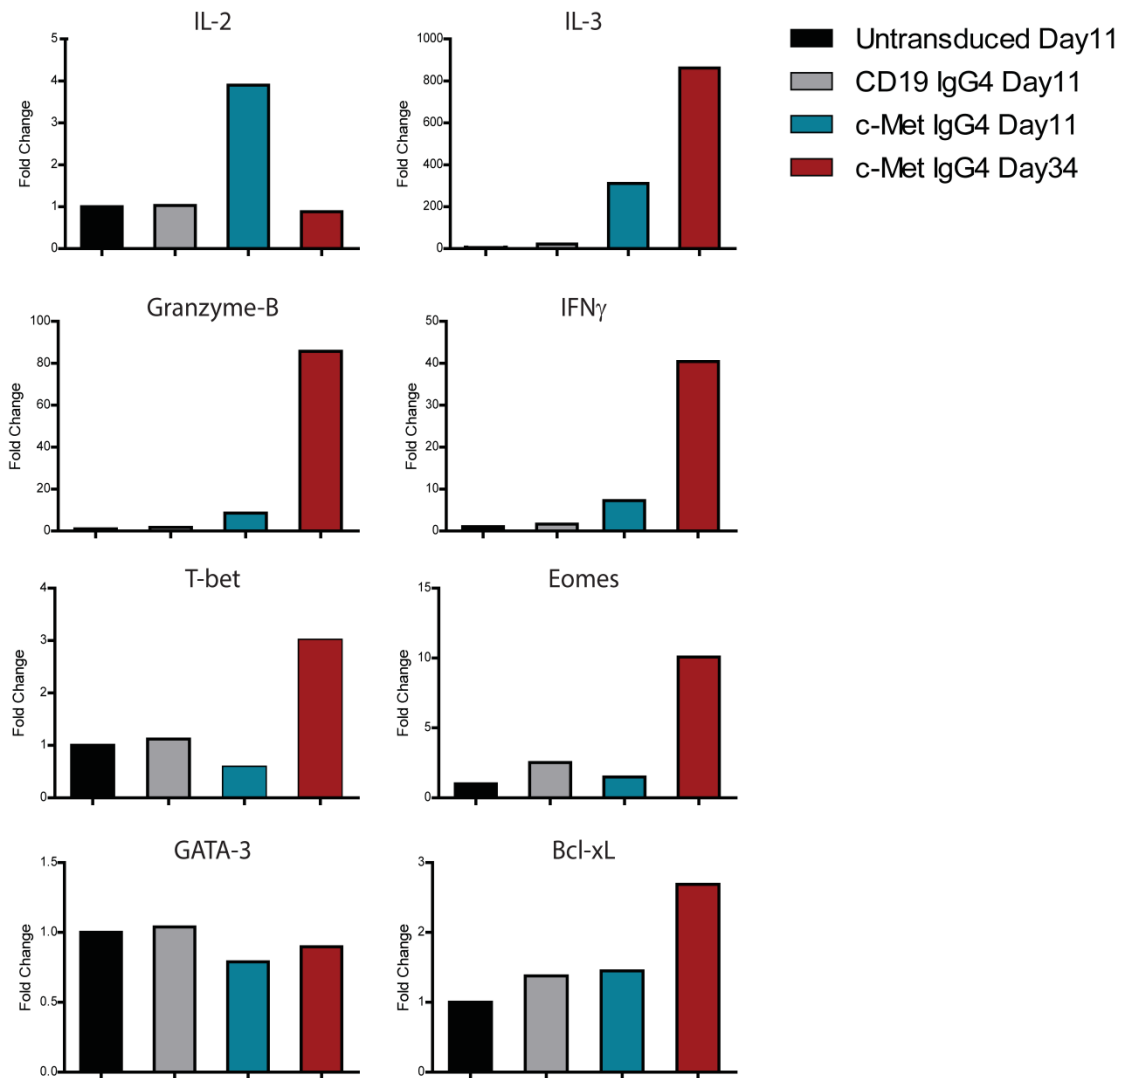

**Supplemental Figure 6A. CARs with a constitutive growth phenotype display a unique gene signature.** Real-time PCR analysis comparing expression of genes between CD19 IgG4 (gray), c-Met IgG4 (day11 – blue, day34 – red) transduced and untransduced (black) T cells at noted timepoints. Fold change are plotted relative to expression level of untransduced T cells. The design of the CAR constructs is shown in Supplemental Figure 1.

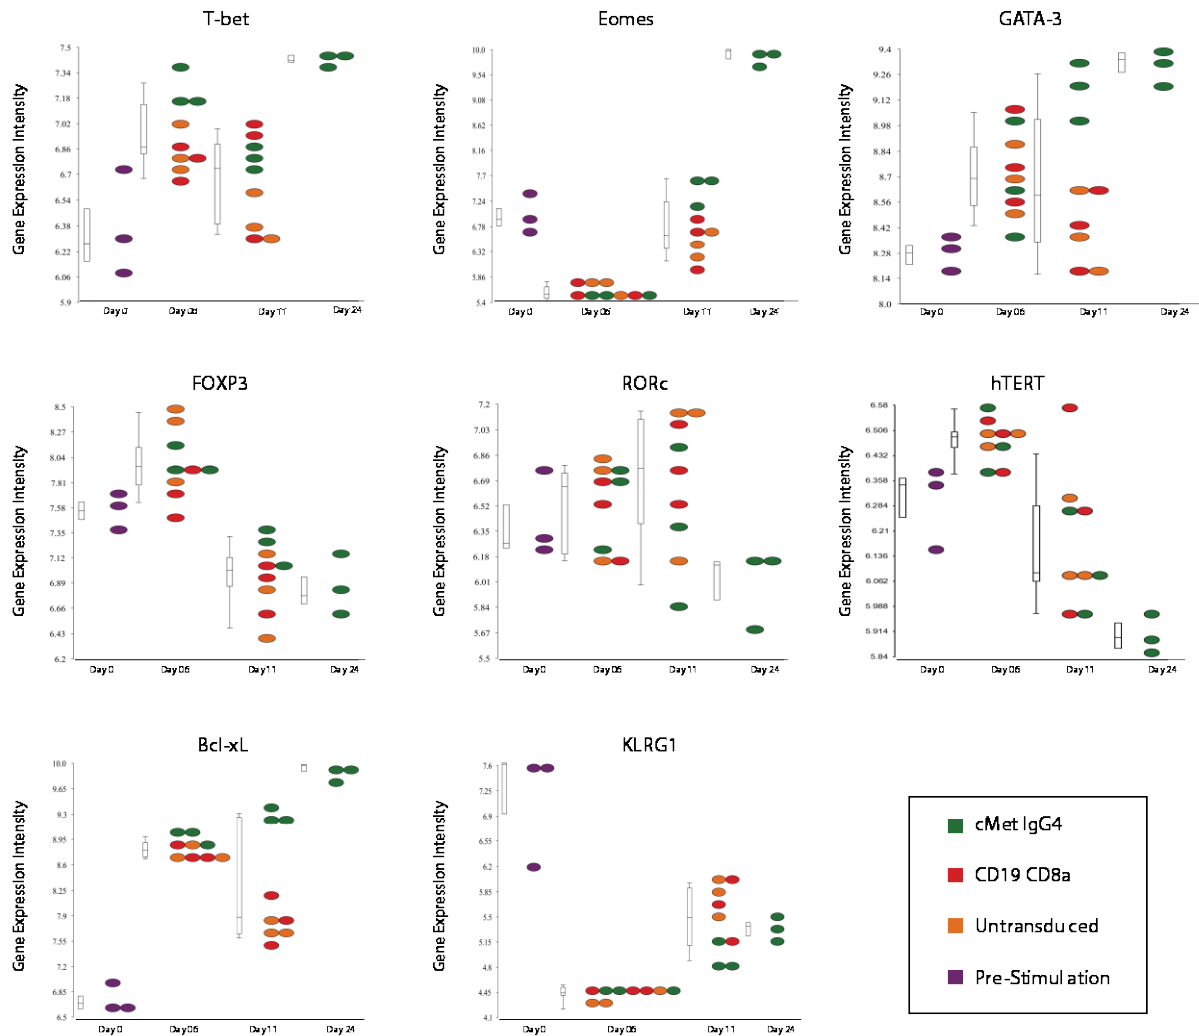

**Supplemental Figure 6B. CAR T cells with a constitutive growth phenotype display distinct transcription factors.** Expression of genes important for T cell polarization, growth and survival: T-bet, Eomes, GATA-3, RORc, FoxP3, Bcl-xL, KLRG1, and hTERT. Normalized absolute log(2) gene expression intensities are plotted. Data is compilation of normal donor triplicates analyzed prior to stimulation (purple), and on days 6, 11 and 24; only the c-Met IgG4 culture is analyzed on day 24 because the other cultures were terminated due to cell death. Each dot denotes a single donor within each time point expressing either the c-Met IgG4 CAR (green), CD19 CD8 $\alpha$  CAR (red), or untransduced control (orange). Box plots representing upper 75<sup>th</sup> and lower 25<sup>th</sup> percentile with median. Whiskers denote upper 90<sup>th</sup> and lower 10<sup>th</sup> percentile. Comparison of c-Met IgG4 CAR (green) vs CD19 CD8 $\alpha$  CAR (red) on day 11 by ANOVA: T-bet ( $p = 0.888$ ); Eomes ( $p = 0.003$ ); GATA-3 ( $p < 0.001$ ); FoxP3 ( $p = 0.122$ ); RORc ( $p = 0.089$ ); KLRG1 ( $P = 0.076$ ); hTERT ( $p = 0.405$ ); and Bcl-xL ( $p < 0.001$ ).

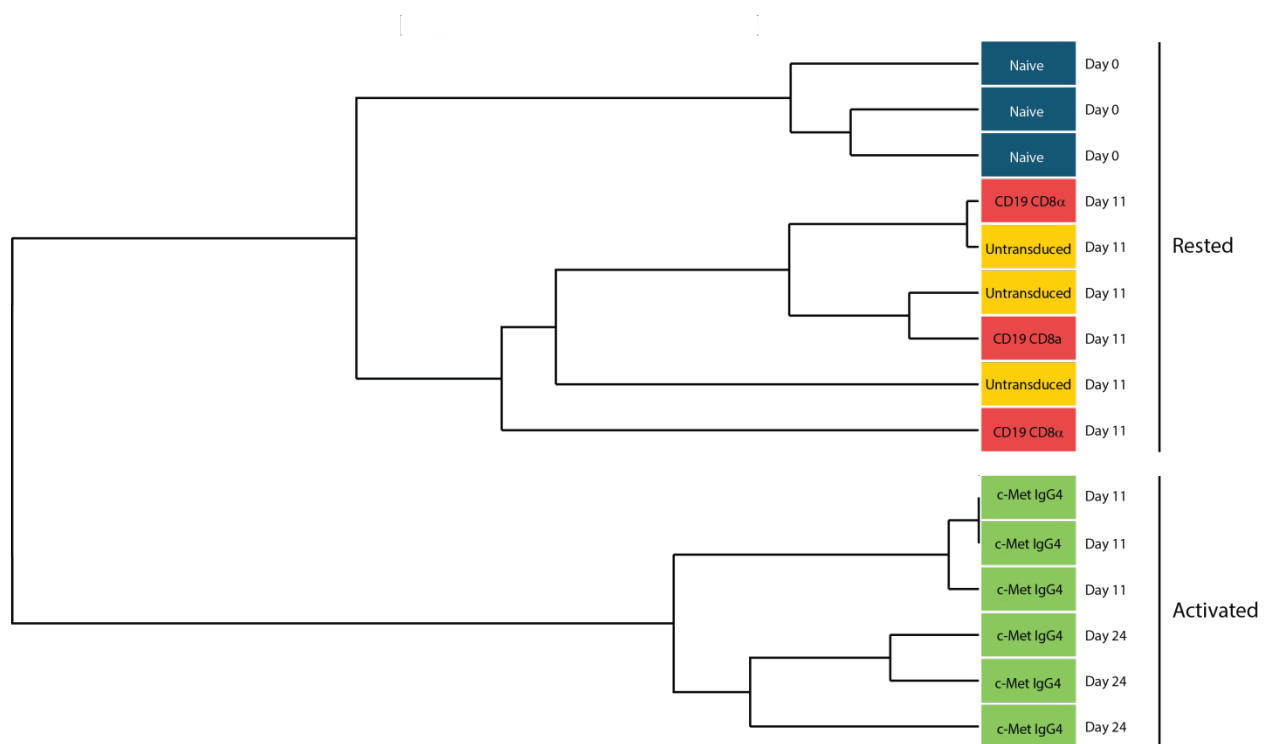

**Supplemental Figure 7. Genome-wide microarray analysis of CAR T cells with constitutive proliferation.** CD4<sup>+</sup> T cells from 3 donors expressing continuous c-Met IgG4 or non-continuous CD19 CD8 $\alpha$  CARs, or mock transduced cells were subjected to microarray analysis and hierarchical clustering from day 0 to day 24 of culture. Clustering was done using the euclidean distance of median normalized absolute log(2) gene expression intensities with average linkage. The plots are based on unbiased whole genome clustering. On day 11, CD19 CD8 $\alpha$  CAR T cells and untransduced cells cluster more similarly to resting T cells, while day 11 and day 24 c-Met IgG4 CAR T cells remain activated and closely cluster.

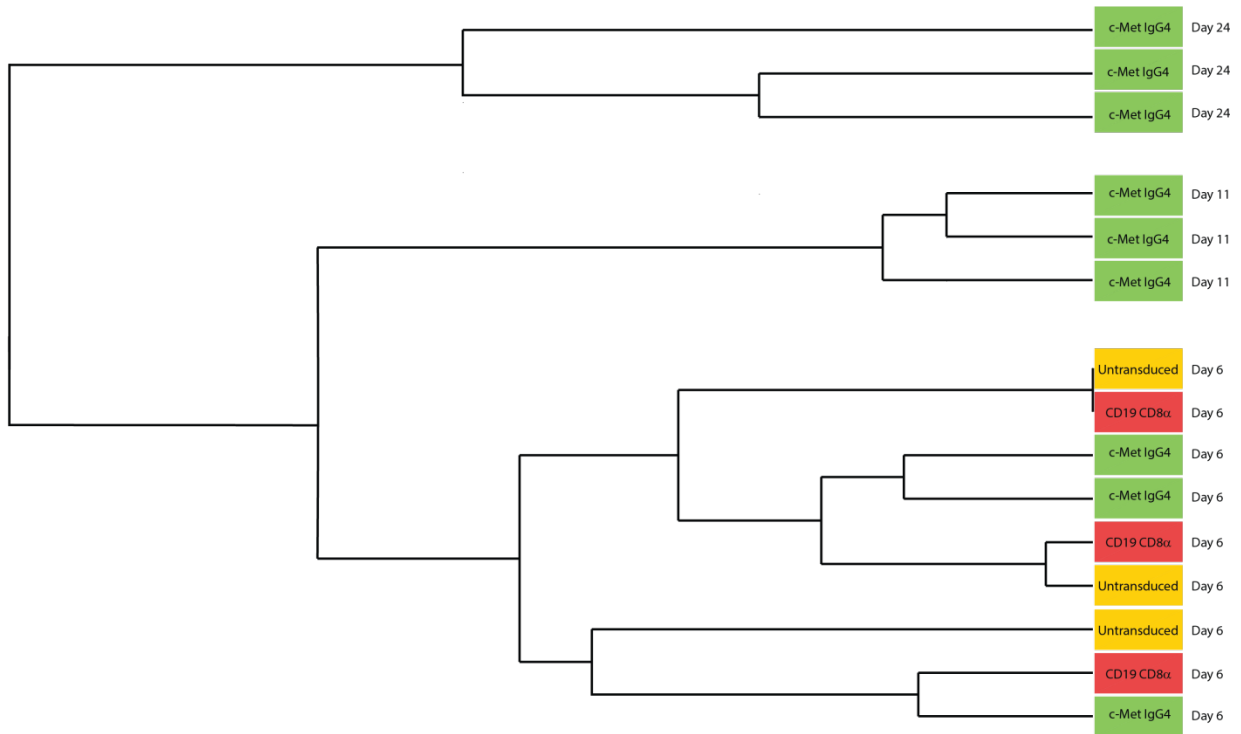

**Supplemental Figure 8. Distinct gene expression signature of CAR T cells with constitutive proliferation.** The gene expression signatures from the 3 donor T cell cultures on day 6 is compared to day 11 and day 24 cultures. CAR T cells on day 6 are similar to mock transduced T cells. In contrast, on day 11 and day 24 the continuous c-Met IgG4 cells display a unique RNA signature that differs from the fully activated day 6 phenotype.

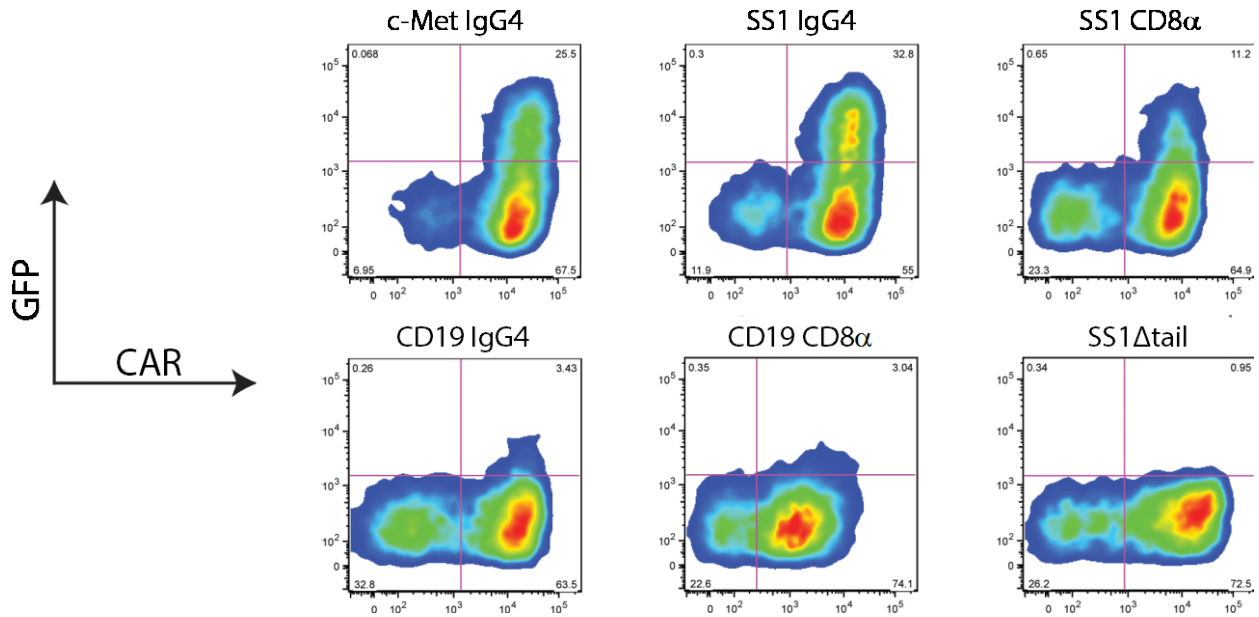

**Supplemental Figure 9. CAR T cells with constitutive proliferation have ligand-independent NFAT activation.** Jurkat T cells engineered to express GFP under the control of the NFAT promoter were transduced with lentivirus encoding CARs for continuous c-Met IgG4, SS1 IgG4, SS1 CD8 $\alpha$ , and non-continuous CARs encoding CD19 IgG4, CD19 CD8 $\alpha$ , and SS1 CD8 $\alpha$  tail. Cells were analyzed 3 days following transduction for GFP and CAR expression.

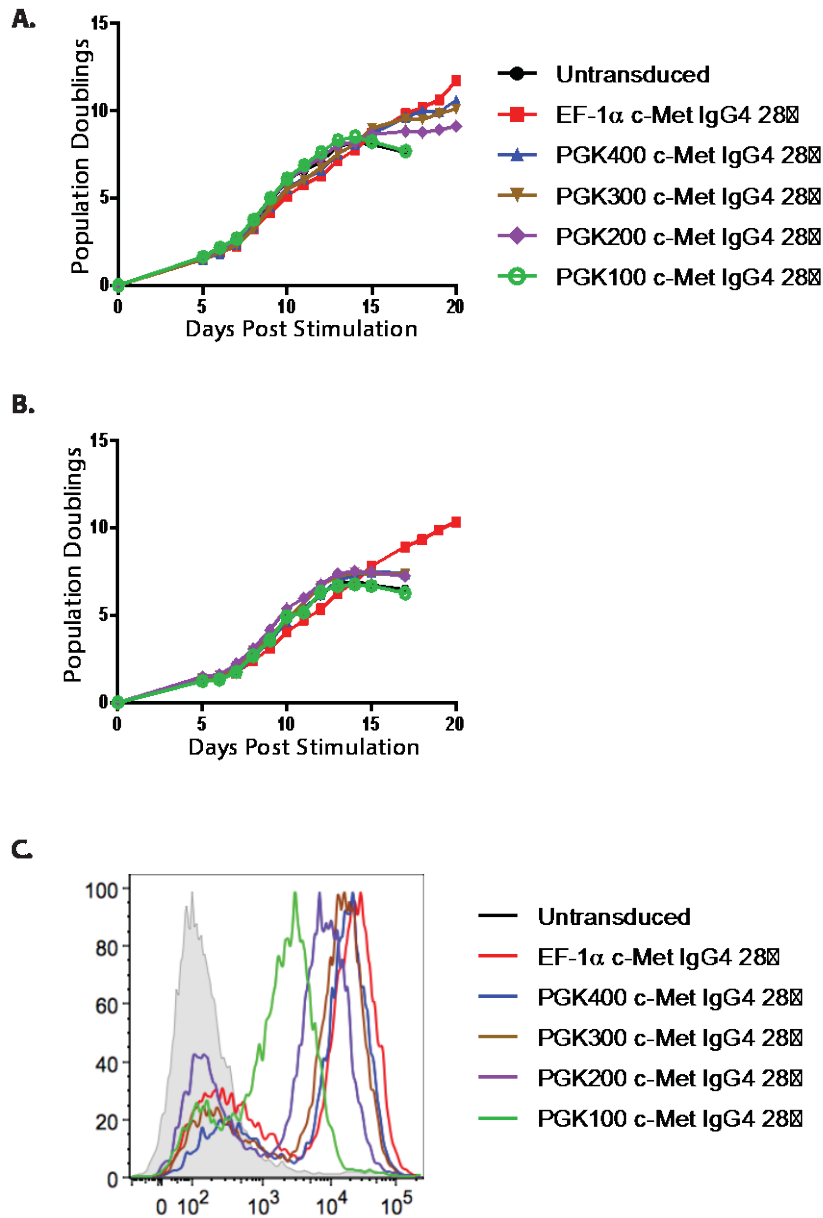

**Supplemental Figure S10. Transgene expression levels are sufficient to convey the constitutive CAR growth phenotype.** In vitro proliferation of human CD4+ (A) and CD8+ (B) T cells following 5 days of  $\alpha$ CD3/CD28 coated magnetic bead stimulation and lentiviral transduction with c-Met IgG4 28 $\zeta$  CARs expressed with the indicated promoter. (C) Comparison of the level of expression of CARs driven by each promoter is shown at 14 days post transduction.



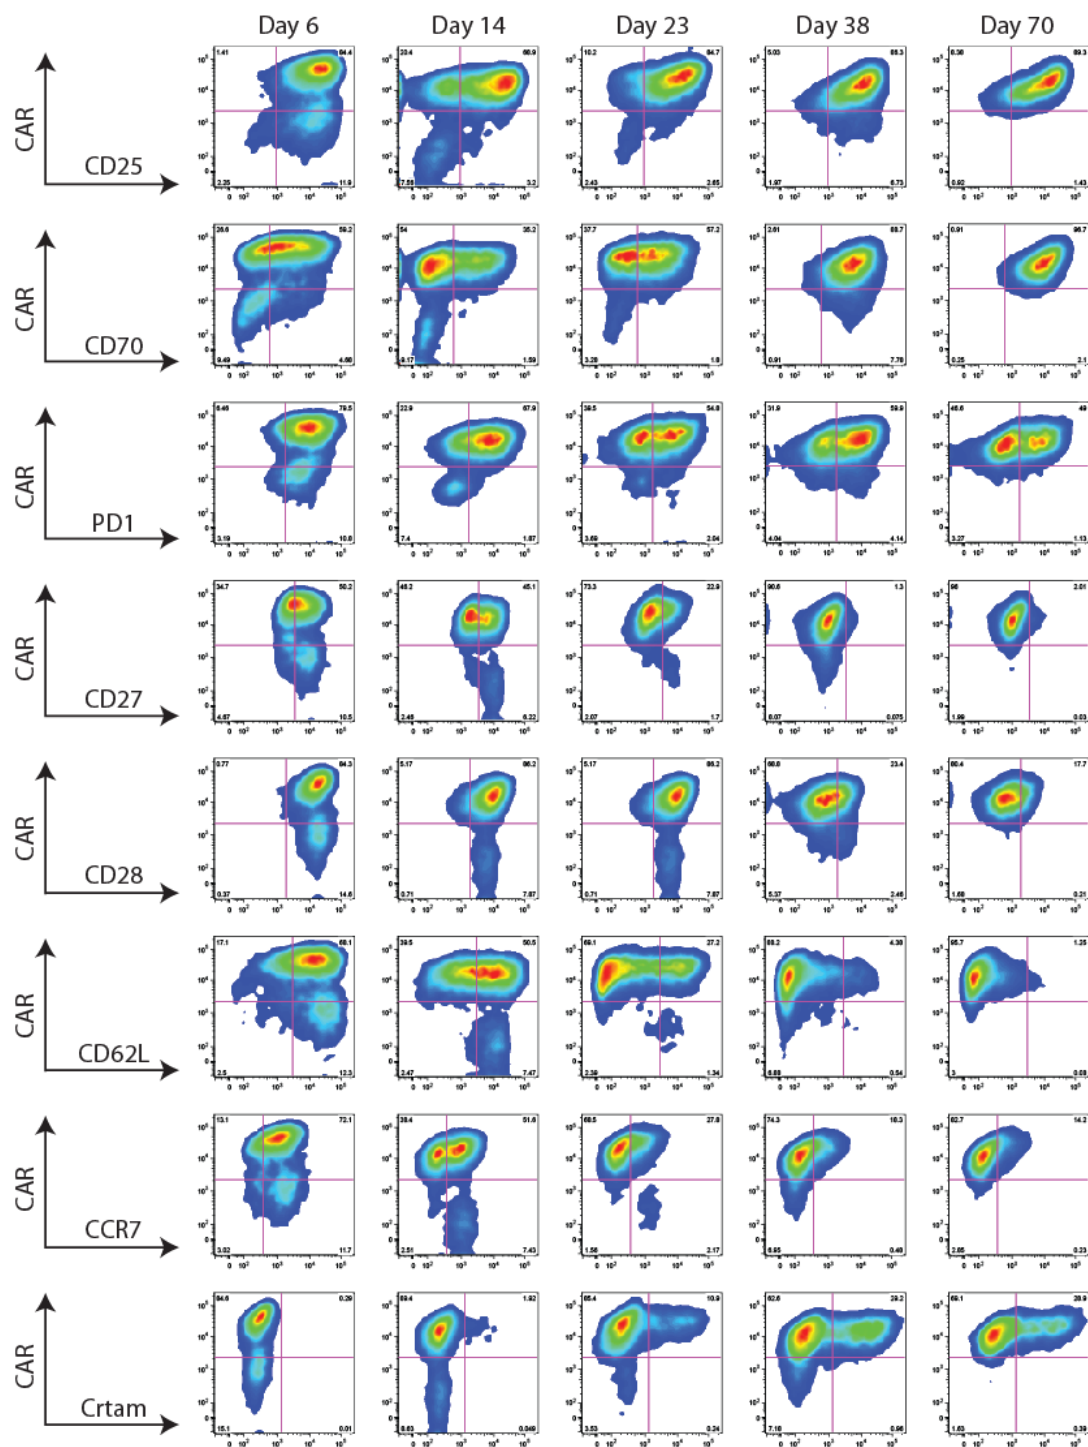

**Supplemental Figure 11. Constitutive CAR T cell proliferation results in differentiation and evolution of a distinct cell surface phenotype.** CD4 T cells were stimulated and transduced with the c-Met IgG4 CAR construct as previously described. Pre-stimulation cells were cryopreserved for later analysis. Cell samples were isolated at day 6, 14, 23, 38 and 70 and cryopreserved. Cells were thawed simultaneously and allowed to rest overnight without addition of cytokines. Cells were stained for CAR as well as CD25, CD70, PD-1, CD27, CD28, CD62L, CCR7 and Crtam as described in materials and methods.

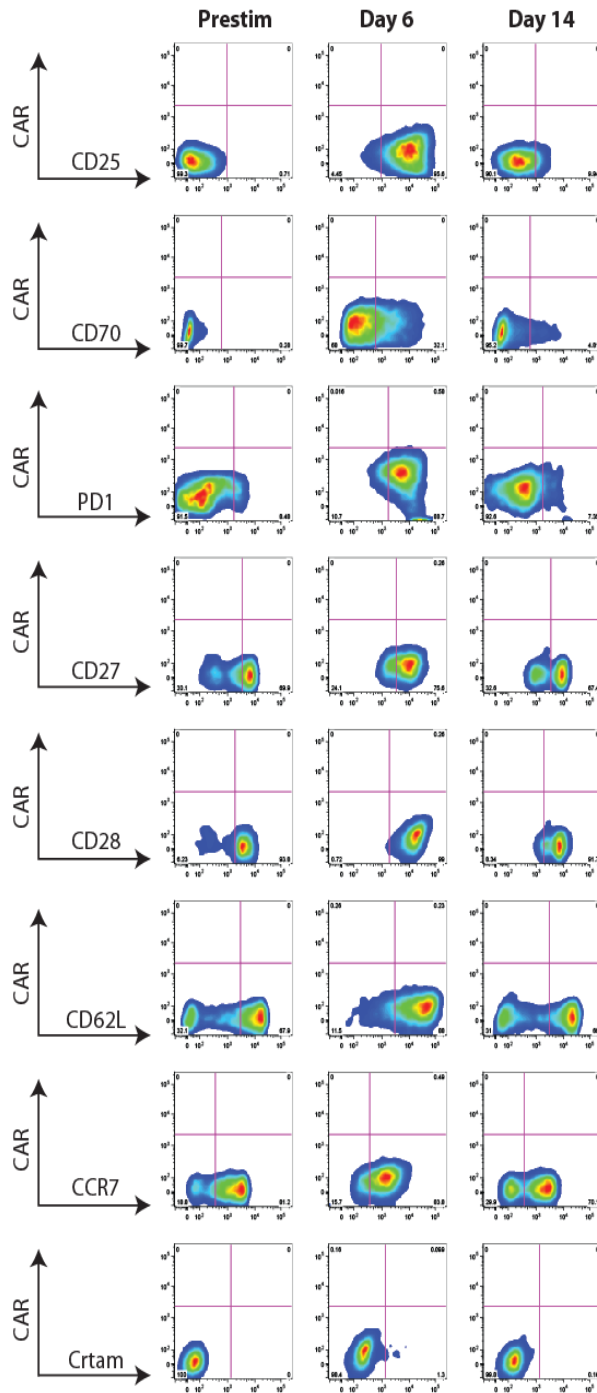

**Supplemental Figure 12. Effects of stimulation and cell culture on differentiation of non-transduced T cells.** Companion CD4 T cells were isolated via negative depletion and stimulated concurrently with the CAR T cells shown in supplemental figure 9. Pre-stimulation cells were cryopreserved for later analysis. Cell samples were isolated for analysis at day 6, 24 hours following bead removal, and on day 14. Cells were thawed simultaneously with the CAR T cells and rested overnight without additional of growth factors or cytokines. Cells were analyzed for CAR expression as well as CD25, CD70, PD-1, CD27, CD28, CD62L, CCR7 and Crtam.

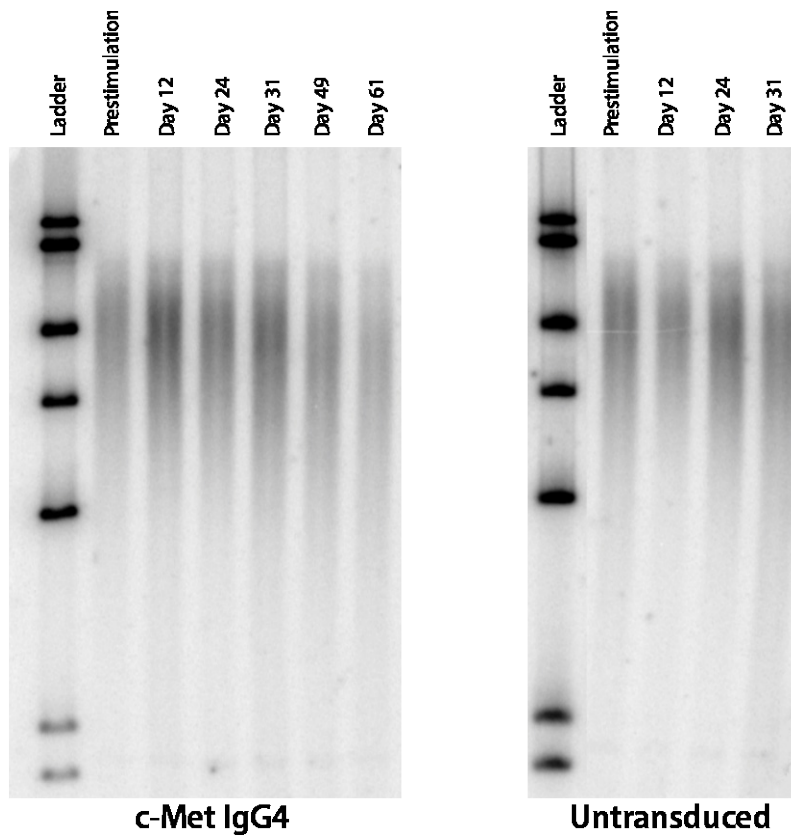

**Supplemental Figure 13. Temporal patterns of telomere restriction fragment length (TRF) in continuous CAR T cells and mock transduced T cells.** CD4 T cells transduced with the continuous c-Met IgG4 CAR or mock transduced cells were cultured for the indicated duration. DNA was isolated from the T cells and terminal telomeric restriction fragment length assessed by electrophoretic separation of HinfI/RsaI digested DNA followed by in-gel hybridization to a telomere repeat probe. The continuous CAR T cells proliferated for at least 61 days in culture while the mock transduced T cells ceased proliferation after 31 days. The ladder is <sup>32</sup>P-labeled mixture of full-length and HindIII-digested lambda DNA.

## Vβ Clonogram

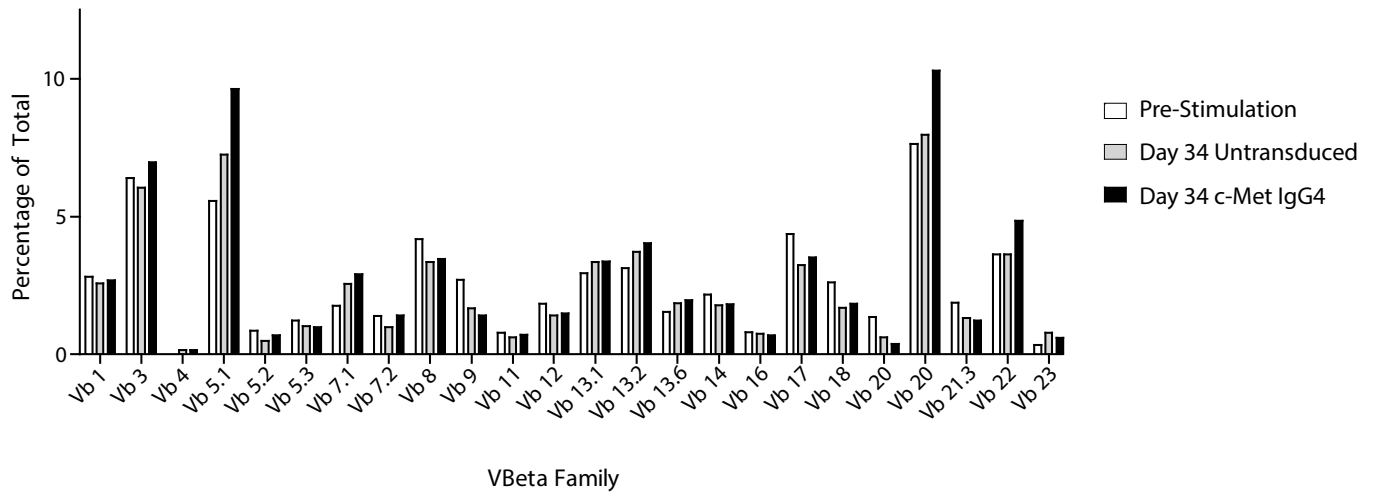

**Supplemental Figure 14. CAR T cells with a constitutive growth phenotype retain a diverse TCR Vβ repertoire.** Human CD4<sup>+</sup> T cells were isolated, stimulated with anti-CD3/CD28, transduced with c-Met IgG4 CAR, and maintained in culture without exogenous cytokines as described. Donor matched mock transduced cells were stimulated and expanded simultaneously as control, however these cultures required additional stimulations to maintain in culture. Cells were cryopreserved at days 0, 13 and 34 after which they were simultaneously thawed and TCR Vβ analysis was performed using the IOTest Beta Mark TCR V kit.

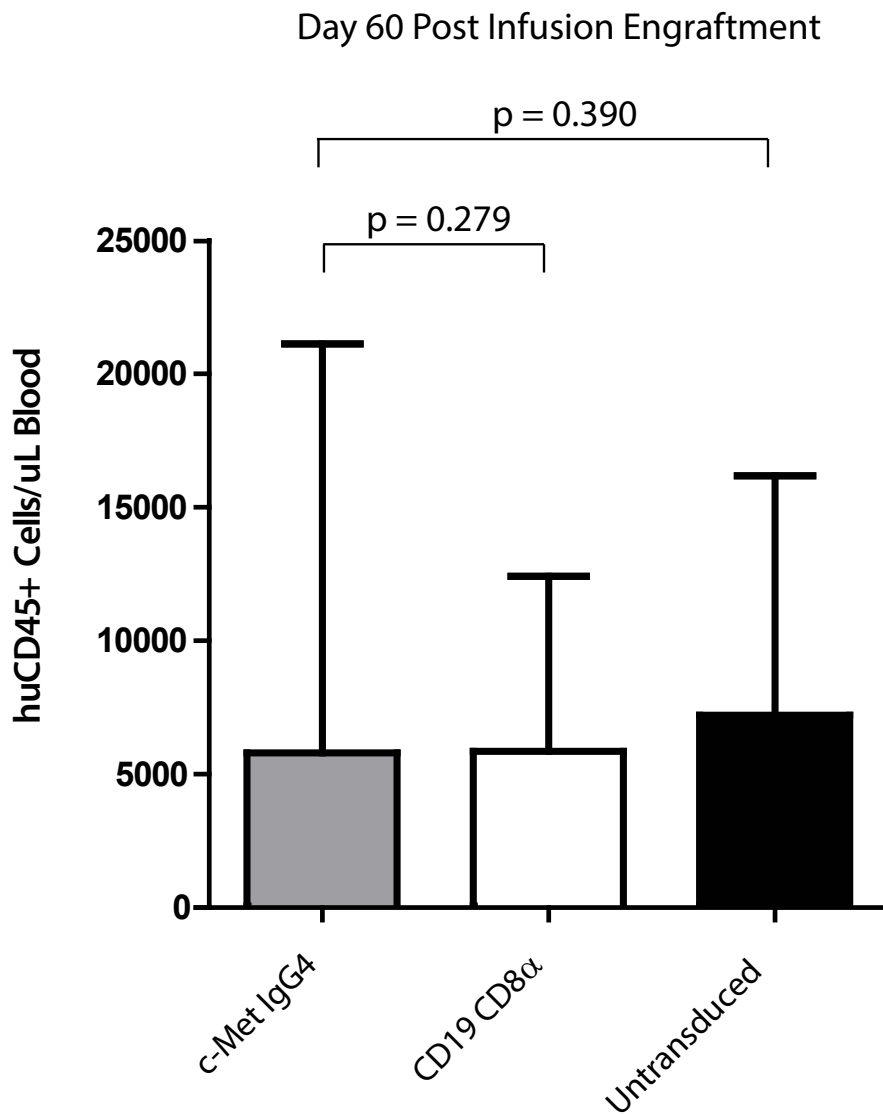

**Supplemental Figure 15. Engraftment and proliferation of continuous CAR T cells in NSG mice.**

Human CD4 T cells ( $10^6$ ) expressing the continuous c-Met IgG4 CAR, the non-continuous CD19 CD8 $\alpha$  CAR (adjusted to 50% CAR positivity) or mock-transduced T cells were infused into NSG mice (n = 10 mice per group). Mice were analyzed 60 days following infusion by peripheral blood TruCounts to quantify huCD45+ cells per  $\mu$ L of mouse blood. Sample means were not different (two tailed Mann-Whitney  $p = 0.39$ ); the bars denote S.D.

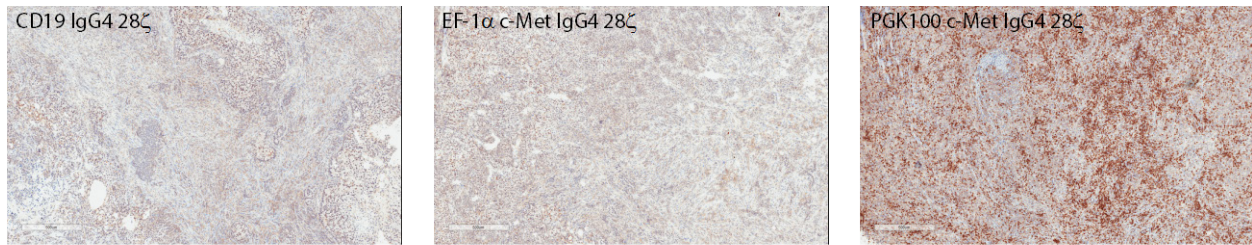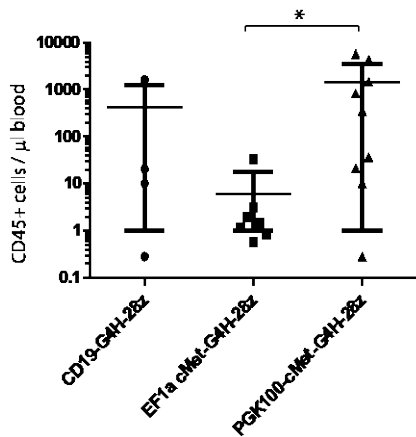

**Supplemental Figure 16. PGK100 promoter results in antigen driven accumulation of CAR T cells in tissue but not blood.** CD4<sup>+</sup> and CD8<sup>+</sup> T cells transduced to express CD19 IgG4 28 $\zeta$  or c-Met IgG4 28 $\zeta$  CAR under the influence of either EF1 $\alpha$  promoter or PGK100 promoter were infused (two administrations,  $16 \times 10^6$  cells in total) into mice bearing subcutaneous L55 tumors pre-established for 12 days. Top, Remaining subcutaneous tumor were sectioned and stained for CD3 to detect the presence of human T cells. Bottom, The absolute number of human CD45<sup>+</sup> T cells was determined in the blood at the end of experiment; note log scale on Y-axis. \* indicates  $p < 0.05$ . Two-tailed student T-test was used for statistical analysis.

#### 4. Supplemental References

53. Crisanti MC, Wallace AF, Kapoor V, Vandermeers F, Dowling ML, Pereira LP, et al. The HDAC inhibitor panobinostat (LBH589) inhibits mesothelioma and lung cancer cells in vitro and in vivo with particular efficacy for small cell lung cancer. *Molecular cancer therapeutics*. 2009;8:2221-31.
54. Zhao Y, Zheng Z, Cohen CJ, Gattinoni L, Palmer DC, Restifo NP, et al. High-efficiency transfection of primary human and mouse T lymphocytes using RNA electroporation. *Molecular therapy : the journal of the American Society of Gene Therapy*. 2006;13:151-9.
55. Zhao Y, Moon E, Carpenito C, Paulos CM, Liu X, Brennan A, et al. Multiple injections of electroporated autologous T cells expressing a chimeric antigen receptor mediate regression of human disseminated tumor. *Cancer Res*. 2010;70:9062-72.
56. Carpenito C, Milone MC, Hassan R, Simonet JC, Lakhali M, Suhoski MM, et al. Control of large, established tumor xenografts with genetically retargeted human T cells containing CD28 and CD137 domains. *Proc Natl Acad Sci U S A*. 2009;106:3360-5.
57. Pfaffl MW. A new mathematical model for relative quantification in real-time RT-PCR. *Nucleic Acids Res*. 2001;29:e45.
58. Bertozzi CC, Chang CY, Jairaj S, Shan X, Huang J, Weber BL, et al. Multiple initial culture conditions enhance the establishment of cell lines from primary ovarian cancer specimens. *In Vitro Cell Dev Biol Anim*. 2006;42:58-62.
